# Supplementary material for: Towards a general solid phase approach for the iterative synthesis of conjugated oligomers using a germanium based linker - first solid phase synthesis of an oligo-(triarylamine)
Source: Royal Society of Chemistry journal article supplement (doi:10.1039/b703022c), 2007-01-01
Supplement: b703022c.pdf [file b703022c.pdf]

# Towards a General Solid Phase Approach for the Iterative Synthesis of Conjugated Oligomers Using a Germanium Based Linker – First Solid Phase Synthesis of an Oligo-(triarylamine)

David J. Turner,<sup>d</sup> Rémi Anémian,<sup>c</sup> Philip R. Mackie,<sup>c</sup> Domenico C. Cupertino,<sup>c</sup> Stephen G. Yeates,<sup>b</sup> Michael L. Turner,<sup>b</sup> Alan C. Spivey\*<sup>a</sup>

<sup>a</sup> Dr A.C. Spivey  
Department of Chemistry  
Imperial College London  
South Kensington campus, London, SW7 2AZ, UK  
Fax: (+) 44 (0)20 75945841  
E-mail: a.c.spivey@imperial.ac.uk

<sup>b</sup> Prof. M.L. Turner, Prof. S.G. Yeates  
Department of Chemistry  
University of Manchester  
Oxford Road, Manchester M13 9PL, UK

<sup>c</sup> Dr R. Anémian, Dr P.R. Mackie, Dr D.C. Cupertino  
Merck Chemicals Ltd  
LC – Manchester Technical Centre  
Hexagon Tower, Blackley, Manchester M9 8ZS UK

<sup>d</sup> Dr D.J. Turner  
Department of Chemistry  
University of Sheffield  
Brook Hill, Sheffield UK S3 7HF UK

## SUPPORTING INFORMATION

|                                                                                                                                       |       |
|---------------------------------------------------------------------------------------------------------------------------------------|-------|
| Experimental Procedures for <b>6</b> , <b>1b-c</b> , <b>8b-e</b> , <b>9b-e</b> , <b>10b-e</b> , <b>12-20</b> , <b>23-28</b> .....     | 2-10  |
| <sup>1</sup> H and <sup>13</sup> C spectra for <b>1b</b> , <b>1c</b> , <b>8a-e</b> and <b>9a-e</b> .....                              | 11-22 |
| <sup>1</sup> H and <sup>13</sup> C spectra for bis-(4-{2-[(4-methoxyphenyl)-di- <i>para</i> -tolylgermany]ethyl}phenoxy)methane.....  | 23    |
| <sup>1</sup> H and <sup>13</sup> C spectra for <b>10a-e</b> and <b>12-18</b> .....                                                    | 24-35 |
| HPLC traces for <b>19</b> .....                                                                                                       | 36    |
| <sup>1</sup> H and <sup>13</sup> C spectra for <b>20</b> , <b>23-26</b> and <b>28</b> .....                                           | 37-42 |
| <b>Fig. 1</b> <sup>1</sup> H MAS NMR (400 MHz, CDCl <sub>3</sub> ) spectra for resins <b>30-36</b> .....                              | 43    |
| <b>Fig. 2</b> Gel phase <sup>13</sup> C NMR (75 MHz, <i>d</i> <sub>8</sub> -THF) spectra for resins <b>39-41</b> & <b>43-47</b> ..... | 44    |
| <b>Fig. 3</b> Gel phase <sup>13</sup> C NMR (75 MHz, <i>d</i> <sub>8</sub> -THF) spectra for resins <b>48</b> & <b>49</b> .....       | 45    |
| <sup>1</sup> H and <sup>13</sup> C spectra for <b>50</b> .....                                                                        | 46    |
| HPLC trace for <b>50</b> .....                                                                                                        | 47    |
| References.....                                                                                                                       | 47    |

**Supplementary Experimental Section** – for general directions see main manuscript.

**2-Bromo-3-(*n*-hexyl)thiophene 6.**<sup>1</sup> To a solution of 3-(*n*-hexyl)thiophene (**11**, 2.97 g, 17.6 mmol) in glacial acetic acid (8.7 mL) was added *N*-bromosuccinimide (3.11 g, 17.6 mmol) under N<sub>2</sub>. The mixture was left to stir at RT for 24 h before partitioning between sat. NaHCO<sub>3</sub> (aq) (50 mL) and ether (50 mL). After evolution of gas ceased the aqueous layer was extracted with ether (2×50 mL), the organic fractions were combined, dried (MgSO<sub>4</sub>) and the solvent removed *in vacuo*. The residue was purified by FC (pentane) to afford bromide **6** as a colourless oil (4.37 g, 99%). R<sub>f</sub> (pentane) 0.80; <sup>1</sup>H NMR (250 MHz, CDCl<sub>3</sub>): δ 0.88 (t, *J* = 6, 3H), 1.20-1.40 (6H), 1.57 (m, 2H), 2.55 (t, *J* = 7.5, 2H), 6.78 (d, *J* = 5.5, 1H), 7.17 (d, *J* = 5.5, 1H); MS (EI+) *m/z* 246 (M<sup>+</sup>); HRMS (EI+) calcd. for C<sub>10</sub>H<sub>15</sub>BrS (M<sup>+</sup>) 246.0078, found 246.0077.

**Triethyl-[3-(*n*-hexyl)thiophen-2-yl]silane 1b.** According to general procedure A, bromide **6** (275 mg, 1.11 mmol), *n*-BuLi (1.04 mL, 1.17 M, 1.22 mmol) in hexanes, and triethylchlorosilane (373 μL, 2.22 mmol) gave silylthiophene **1b** as a colourless oil (260 mg, 83%). R<sub>f</sub> 0.70 (pentane); <sup>1</sup>H NMR (250 MHz, CDCl<sub>3</sub>): δ 0.78-1.01 (18H), 1.22-1.41 (6H), 1.59 (m, 2H), 2.64 (t, *J* = 7.5, 2H), 7.05 (d, *J* = 4.5, 1H), 7.47 (d, *J* = 4.5, 1H); <sup>13</sup>C NMR (62.8 MHz, CDCl<sub>3</sub>) δ 4.7 (t, 3C), 7.5 (q, 3C), 14.1 (q), 22.7 (t), 29.5 (t), 31.4 (t), 31.8 (t), 31.8 (t), 129.4 (s), 129.7 (d), 130.1 (d), 150.7 (s); IR (neat) 2955-2875 (C-H), 1512, 1458, 1416, 1402, 1378, 1238, cm<sup>-1</sup>; MS (EI+) *m/z* 282 (M<sup>+</sup>); HRMS calcd. for C<sub>16</sub>H<sub>30</sub>SSi (M<sup>+</sup>) 282.1838, found 282.1837; Anal. calcd. for C<sub>16</sub>H<sub>30</sub>SSi: C 68.0, H 10.7, S 11.4, found C 68.2, H 10.8, S 11.5.

***tert*-Butyl-[3-(*n*-hexyl)thiophen-2-yl]dimethylsilane 1c.** According to general procedure A, bromide **6** (275 mg, 1.11 mmol), *n*-BuLi (1.04 mL, 1.17 M, 1.22 mmol) in hexanes, and *tert*-butylchlorodimethylsilane (335 mg, 2.22 mmol) gave silylthiophene **1c** as a colourless oil (238 mg, 76%). R<sub>f</sub> 0.75 (pentane); <sup>1</sup>H NMR (250 MHz, CDCl<sub>3</sub>): δ 0.33 (s, 6H), 0.85-0.92 (12H), 1.23-1.38 (6H), 1.57 (m, 2H), 2.66 (t, *J* = 8, 2H), 7.05 (d, *J* = 5, 1H), 7.47 (d, *J* = 5, 1H); <sup>13</sup>C NMR (62.8 MHz, CDCl<sub>3</sub>) δ -3.6 (q, 2C), 14.1 (q), 17.9 (s), 22.6 (t), 26.8 (q, 2C), 29.6 (t), 31.8 (t, 2C), 31.9 (t), 118.9 (s), 129.8 (d), 130.1 (d), 151.1 (s); IR (neat) 2960-2855 (C-H), 1513, 1464, 1403, 1362, 1250 [Si(CH<sub>3</sub>)<sub>n</sub>] cm<sup>-1</sup>; MS (EI+) *m/z* 282 (M<sup>+</sup>); HRMS calcd. for C<sub>16</sub>H<sub>30</sub>SSi (M<sup>+</sup>) 282.1838, found 282.1833; Anal. calcd. for C<sub>16</sub>H<sub>30</sub>SSi: C 68.0, H 10.7, S 11.4, found C 68.0, H 10.8, S 11.4.

**4-{2-[Diethyl-(4-methoxyphenyl)germanyl]ethyl}phenol 8b.** According to general procedure B, 4-{2-dichloro-(4-methoxyphenyl)germanyl]ethyl}phenol (**7**)<sup>2</sup> (272 mg, 730 μmol) and EtMgBr (3.63 mL, 2.0 M, 7.26 mmol) in THF gave diethylgermane **8b** as a pale yellow oil (195 mg, 74%). R<sub>f</sub> 0.55 (petrol/EtOAc, 3/1); <sup>1</sup>H NMR (250 MHz, CDCl<sub>3</sub>): δ 0.82-1.15 (10H); 1.20 (m, 2H), 2.54 (m, 2H), 3.74 (s, 3H), 4.57 (broad s, 1H), 6.66 (d, *J* = 8.5, 2H), 6.85 (d, *J* = 8.5, 2H), 6.97 (d, *J* = 8.5, 2H), 7.29 (d, *J* = 8.5, 2H); <sup>13</sup>C NMR (62.8 MHz, CDCl<sub>3</sub>) δ 4.8 (t, 2C), 9.0 (q, 2C), 14.5 (t), 30.3 (t), 55.1 (q), 113.9 (d, 2C), 115.2 (d, 2C), 128.9 (d, 2C), 130.2 (s), 135.2 (d, 2C), 137.4 (s), 153.5 (s), 159.8 (s); IR (neat) 3402 (broad, O-H), 3020-2835 (C-H), 1612, 1593, 1568, 1512, 1499, 1461, 1337, 1279, 1246 cm<sup>-1</sup>; MS (EI+) *m/z* 360 (M<sup>+</sup>); HRMS calcd. for C<sub>19</sub>H<sub>26</sub>Ge<sup>74</sup>O<sub>2</sub> (M<sup>+</sup>) 360.1145, found 360.1147.

**4-{2-[Diisopropyl-(4-methoxyphenyl)germanyl]ethyl}phenol 8c.** According to general procedure B, 4-{2-dichloro-(4-methoxyphenyl)germanyl]ethyl}phenol (**7**)<sup>2</sup> (272 mg, 730 μmol) and isopropyl magnesium chloride (3.63 mL, 2.0 M, 7.26 mmol) in THF gave di-*iso*-propylgermane **8c** as a pale yellow oil (150 mg, 53%). R<sub>f</sub> 0.55 (petrol/EtOAc, 3/1); <sup>1</sup>H NMR (250 MHz, CDCl<sub>3</sub>): δ 1.04 (d, *J* = 7.5, 6H), 1.07 (d, *J* = 7.5, 6H), 1.25 (m, 2H), 1.46 (sept, *J* = 7.5, 2H), 2.62 (m,

2H), 3.74 (s, 3H), 4.71 (broad s, 1H), 6.68 (d,  $J = 8.5$ , 2H), 6.85 (d,  $J = 9$ , 2H), 7.01 (d,  $J = 8.5$ , 2H), 7.29 (d,  $J = 9$ , 2H);  $^{13}\text{C}$  NMR (62.8 MHz,  $\text{CDCl}_3$ )  $\delta$  12.5 (t), 14.2 (d, 2C), 19.5 (q, 2C), 19.6 (q, 2C), 30.7 (t), 55.0 (q), 113.7 (d, 2C), 115.3 (d, 2C), 128.5 (s), 128.8 (d, 2C), 135.8 (d, 2C), 137.8 (s), 153.5 (s), 159.7 (s); IR (neat) 3402 (broad, O-H), 3020-2861 (C-H), 1612, 1592, 1568, 1513, 1499, 1463, 1365, 1278, 1246  $\text{cm}^{-1}$ ; MS (ES-)  $m/z$  387 ((M-H)); HRMS (EI+) calcd. for  $\text{C}_{21}\text{H}_{30}\text{Ge}^{74}\text{O}_2$  ( $\text{M}^+$ ) 388.1458, found 388.1466.

**4-{2-[(4-Methoxyphenyl)diphenylgermanyl]ethyl}phenol 8d.** According to general procedure B, 4-{2-dichloro-(4-methoxyphenyl)germanyl}ethyl}phenol (**7**)<sup>2</sup> (275 mg, 738  $\mu\text{mol}$ ) and phenyl magnesium bromide (2.47 mL, 3.0 M, 7.41 mmol) in  $\text{Et}_2\text{O}$  gave diphenylgermane **8d** as a pale yellow oil (310 mg, 92%).  $R_f$  0.30 (petrol/ $\text{EtOAc}$ , 3/1);  $^1\text{H}$  NMR (250 MHz,  $\text{CDCl}_3$ ):  $\delta$  1.79 (m, 2H), 2.79 (m, 2H), 3.84 (s, 3H), 5.00 (broad s, 1H), 6.74 (d,  $J = 8.5$ , 2H), 6.97 (d,  $J = 8.5$ , 2H), 7.07 (d,  $J = 8.5$ , 2H), 7.37-7.55 (12H);  $^{13}\text{C}$  NMR (62.8 MHz,  $\text{CDCl}_3$ )  $\delta$  16.5 (t), 21.6 (q, 2C), 30.3 (t), 55.2 (q), 114.2 (d, 2C), 115.3 (d, 2C), 127.6 (s), 128.3 (d, 4C), 129.0 (d, 2C), 135.0 (d, 4C), 136.3 (d, 2C), 137.0 (s, 2C), 137.3 (s), 153.6 (s), 160.4 (s); IR (neat) 3407 (broad, O-H), 3020-2835 (C-H), 1611, 1592, 1567, 1513, 1500, 1442, 1430, 1337, 1281, 1247  $\text{cm}^{-1}$ ; MS (EI+)  $m/z$  456 ( $\text{M}^+$ ); HRMS (EI+) calcd. for  $\text{C}_{27}\text{H}_{26}\text{Ge}^{74}\text{O}_2$  ( $\text{M}^+$ ) 456.1143, found 456.1145.

**4-{2-[(4-Methoxyphenyl)-di-*para*-tolylgermanyl]ethyl}phenol 8e.** According to general procedure B, 4-{2-dichloro-(4-methoxyphenyl)germanyl}ethyl}phenol (**7**)<sup>2</sup> (186 mg, 499  $\mu\text{mol}$ ) and the Grignard reagent formed between Mg (120 mg, 5.00 mmol) and 4-bromotoluene (855 mg, 5.00 mmol) gave di-*para*-tolylgermane **8e** as a yellow oil (222 mg, 92%).  $R_f$  0.40 (petrol/ $\text{EtOAc}$ , 3/1);  $^1\text{H}$  NMR (250 MHz,  $\text{CDCl}_3$ ):  $\delta$  1.76 (m, 2H), 2.36 (s, 6H), 2.74 (m, 2H), 3.81 (s, 3H), 4.64 (broad s, 1H), 6.71 (d,  $J = 8.5$ , 2H), 6.92 (d,  $J = 8.5$ , 2H), 7.04 (d,  $J = 8.5$ , 2H), 7.19 (d,  $J = 8$ , 4H), 7.38 (d,  $J = 8$ , 4H), 7.40 (d,  $J = 8.5$ , 2H);  $^{13}\text{C}$  NMR (62.8 MHz,  $\text{CDCl}_3$ )  $\delta$  16.6 (t), 21.6 (q, 2C), 30.4 (t), 55.2 (q), 114.2 (d, 2C), 115.3 (d, 2C), 128.2 (s), 129.0 (d, 2C), 129.2 (d, 4C), 133.8 (s, 2C), 135.0 (d, 4C), 136.3 (d, 2C), 137.1 (s), 138.8 (s, 2C), 153.6 (s), 160.3 (s); IR (neat) 3409 (broad, O-H), 3015-2860 (C-H), 1593, 1568, 1512, 1442, 1392, 1281, 1247  $\text{cm}^{-1}$ ; MS (EI+)  $m/z$  484 ( $\text{M}^+$ ); HRMS (EI+) calcd. for  $\text{C}_{29}\text{H}_{30}\text{Ge}^{74}\text{O}_2$  ( $\text{M}^+$ ) 484.1458, found 484.1446; Anal. calcd. for  $\text{C}_{29}\text{H}_{30}\text{GeO}_2$ : C 72.1, H 6.3, found C 72.6, H 6.1.

**{2-[4-(2-Ethoxyethoxy)phenyl]ethyl}diethyl-(4-methoxyphenyl)germane 9b.** According to general procedure C, phenol **8b** (150 mg, 41.8  $\mu\text{mol}$ ), 2-chlorodiethyl ether (100  $\mu\text{L}$ , 911  $\mu\text{mol}$ ), TBAI (15.5 mg, 42.0  $\mu\text{mol}$ ) and caesium carbonate (222 mg, 629  $\mu\text{mol}$ ) gave ether **9b** as a pale yellow oil (163 mg, 90%).  $R_f$  0.30 (petrol/ $\text{EtOAc}$ , 9/1);  $^1\text{H}$  NMR (250 MHz,  $\text{CDCl}_3$ ):  $\delta$  0.91-1.11 (10H), 1.22-1.32 (5H), 2.64 (m, 2H), 3.61 (q,  $J = 7$ , 2H), 3.79 (t,  $J = 4.5$ , 2H), 3.82 (s, 3H), 4.10 (t,  $J = 4.5$ , 2H), 6.85 [d,  $J = 8.5$ , 2H], 6.93 [d,  $J = 8.5$ , 2H], 7.10 [d,  $J = 8.5$ , 2H], 7.37 [d,  $J = 8.5$ , 2H];  $^{13}\text{C}$  NMR (62.8 MHz,  $\text{CDCl}_3$ )  $\delta$  4.8 (t, 2C), 9.0 (q, 1C), 14.4 (t, 1C), 15.2 (q, 1C), 30.3 (t, 1C), 55.0 (q, 1C), 66.9 (t, 1C), 67.6 (t, 1C), 69.1 (t, 1C), 113.8 (d, 2C), 114.6 (d, 2C), 128.7 (d, 2C), 130.0 (s, 1C), 135.1 (d, 2C), 137.4 (s, 1C), 157.0 (s, 1C), 159.8 (s, 1C); IR (neat) 3030-2870 (C-H), 1611, 1593, 1568, 1511, 1500, 1456, 1374, 1279, 1246  $\text{cm}^{-1}$ ; MS (EI+)  $m/z$  432 ( $\text{M}^+$ ); HRMS calcd. for  $\text{C}_{23}\text{H}_{34}\text{Ge}^{74}\text{O}_3$  ( $\text{M}^+$ ) 432.1720, found 432.1722.

**{2-[4-(2-Ethoxyethoxy)phenyl]ethyl}diisopropyl-(4-methoxyphenyl)germane 9c.** According to general procedure C, phenol **8c** (115 mg, 297  $\mu\text{mol}$ ), 2-chlorodiethyl ether (71.0  $\mu\text{L}$ , 647  $\mu\text{mol}$ ), TBAI (11.0 mg, 29.7  $\mu\text{mol}$ ) and caesium carbonate (159 mg, 451  $\mu\text{mol}$ ) gave ether **9c** as a pale yellow oil (105 mg, 77%).  $R_f$  0.30 (petrol/ $\text{EtOAc}$ , 9/1);  $^1\text{H}$  NMR (250 MHz,  $\text{CDCl}_3$ ):  $\delta$  1.12 (d,  $J = 7.5$ , 6H), 1.16 (d,  $J = 7.5$ , 6H), 1.25 (t,  $J = 7$ , 3H), 1.34 (m, 2H), 1.54 (sept,  $J = 7.5$ , 2H), 2.70 (m, 2H), 3.61 (q,  $J = 7$ , 2H), 3.79 (t,  $J = 4.5$ , 2H), 3.82 (s,  $\text{OCH}_3$ , 3H), 4.11 (t,  $J = 4.5$ , 2H), 6.87 (d,  $J = 8.5$ , 2H), 6.93 (d,  $J = 9$ , 2H), 7.13 (d,  $J = 8.5$ , 2H), 7.37 (d,  $J = 9$ , 2H);  $^{13}\text{C}$  NMR (62.8 MHz,  $\text{CDCl}_3$ )  $\delta$  12.5 (t, 1C), 14.2 (d,

2C), 15.2 (q, 1C), 19.6 (q, 2C), 19.6 (q, 2C), 30.7 (t, 1C), 55.0 (q, 1C), 66.9 (t, 1C), 67.6 (t, 1C), 69.1 (t, 1C), 113.7 (d, 2C), 114.6 (d, 2C), 128.4 (s, 1C), 128.6 (d, 2C), 135.8 (d, 2C), 137.9 (s, 1C), 157.0 (s, 1C), 159.8 (s, 1C); IR (neat) 3025-2860 (C-H), 1610, 1593, 1567, 1510, 1500, 1461, 1372, 1298, 1279, 1247  $\text{cm}^{-1}$ ; MS (EI+)  $m/z$  459 ((M-H)<sup>+</sup>); HRMS calcd. for  $\text{C}_{25}\text{H}_{38}\text{Ge}^{74}\text{O}_3$  ( $\text{M}^+$ ) 460.2033, found 460.2023.

**{2-[4-(2-Ethoxyethoxy)phenyl]ethyl}-(4-methoxyphenyl)diphenylgermane 9d.** According to general procedure C. phenol **8d** (124 mg, 272  $\mu\text{mol}$ ), 2-chlorodiethyl ether (65.0  $\mu\text{L}$ , 592  $\mu\text{mol}$ ), TBAI (10.0 mg, 27.1  $\mu\text{mol}$ ) and caesium carbonate (143 mg, 405  $\mu\text{mol}$ ) gave ether **9d** as a pale yellow oil (115 mg, 80%).  $R_f$  0.75 (petrol/EtOAc, 3/1);  $^1\text{H}$  NMR (250 MHz,  $\text{CDCl}_3$ ):  $\delta$  1.25 (t,  $J = 7$ , 3H), 1.82 (m, 2H), 2.77 (m, 2H), 3.60 (q,  $J = 7$ , 2H), 3.78 (t,  $J = 5.5$ , 2H), 3.82 (s, 3H), 4.10 (t,  $J = 5.5$ , 2H), 6.83 (d,  $J = 8.5$ , 2H), 6.94 (d,  $J = 8.5$ , 2H), 7.08 (d,  $J = 8.5$ , 2H), 7.34-7.52 ( $\text{CH}_3\text{OC}(\text{=CH})\text{CH}$ ,  $2 \times \text{CH}=\text{CHCH}=\text{CHCH}$ , m, 12H);  $^{13}\text{C}$  NMR (62.8 MHz,  $\text{CDCl}_3$ )  $\delta$  15.3 (q, 1C), 16.4 (t, 1C), 30.3 (t, 1C), 55.1 (q, 1C), 66.8 (t, 1C), 67.6 (t, 1C), 69.1 (t, 1C), 114.1 (d, 2C), 114.7 (d, 2C), 127.5 (s, 1C), 128.3 (d, 4C), 128.7 (d, 2C), 135.0 (d, 4C), 128.9 (d, 2C), 136.3 (d, 2C), 137.0 (s, 2C), 137.3 (s, 1C), 157.1 (s, 1C), 160.4 (s, 1C); IR (neat) 3010-2870 (C-H), 1610, 1593, 1567, 1510, 1456, 1430, 1372, 1281, 1247  $\text{cm}^{-1}$ ; MS (EI+)  $m/z$  528 ( $\text{M}^+$ ); HRMS (EI+) calcd. for  $\text{C}_{31}\text{H}_{34}\text{Ge}^{74}\text{O}_3$  ( $\text{M}^+$ ) 528.1720, found 528.1717.

**{2-[4-(2-Ethoxyethoxy)phenyl]ethyl}-(4-methoxyphenyl)di-*para*-tolylgermane 9e.** According to general procedure C. phenol **8e** (9.57 g, 19.8 mmol), 2-chlorodiethyl ether (4.56 mL, 41.5 mmol), TBAI (739 mg, 2.00 mmol) and caesium carbonate (14.1 g, 40.0 mmol) gave:

*Ether 9e* as a colourless oil (7.81 g, 71%):  $R_f$  0.55 (petrol/EtOAc, 9/1);  $^1\text{H}$  NMR (250 MHz,  $\text{CDCl}_3$ ):  $\delta$  1.24 (t,  $J = 7$ , 3H), 1.76 (m, 2H), 2.36 (s, 6H), 2.74 (m, 2H), 3.59 (q,  $J = 7$ , 2H), 3.77 (t,  $J = 5.5$ , 2H), 3.81 (s, 3H), 4.09 (q,  $J = 5.5$ , 2H), 6.82 (d,  $J = 8.5$ , 2H), 6.92 (d,  $J = 8.5$ , 2H), 7.07 (d,  $J = 8.5$ , 2H), 7.18 (d,  $J = 8$ , 4H), 7.38 (d,  $J = 8$ , 4H), 7.40 (d,  $J = 8.5$ , 2H);  $^{13}\text{C}$  NMR (62.8 MHz,  $\text{CDCl}_3$ )  $\delta$  15.3 (q), 16.6 (t), 21.6 (q, 2C), 30.4 (t), 55.1 (q), 66.9 (t), 67.6 (t), 69.1 (t), 114.1 (d, 2C), 114.7 (d, 2C), 128.0 (s), 128.8 (d, 2C), 129.1 (d, 4C), 133.8 (s, 2C), 135.0 (d, 4C), 136.3 (d, 2C), 137.2 (s), 138.7 (s, 2C), 157.0 (s), 160.4 (s); IR (neat) 3010-2925 (C-H), 1593, 1567, 1510, 1454, 1392, 1281, 1247  $\text{cm}^{-1}$ ; MS (EI+)  $m/z$  556 ( $\text{M}^+$ ); HRMS (EI+) calcd. for  $\text{C}_{33}\text{H}_{38}\text{Ge}^{74}\text{O}_3$  ( $\text{M}^+$ ) 556.2033, found 556.2042.

*Bis-(4-{2-[4-(4-methoxyphenyl)-di-*para*-tolylgermanyl]ethyl}phenoxy)methane<sup>§</sup>* as white needles (1.94 g, 20%). Mp 43.0-44.5  $^\circ\text{C}$ ;  $R_f$  0.50 (petrol/EtOAc, 3/1);  $^1\text{H}$  NMR (250 MHz,  $\text{CDCl}_3$ ):  $\delta$  1.77 (m, 4H), 2.37 (s, 12H), 2.76 (m, 4H), 3.82 (s, 6H), 5.66 (s, 2H), 6.93 (d,  $J = 9$ , 4H), 7.00 (d,  $J = 8.5$ , 4H), 7.10 (d,  $J = 8.5$ , 4H), 7.20 (d,  $J = 8$ , 8H), 7.36-7.42 (12H);  $^{13}\text{C}$  NMR (62.8 MHz,  $\text{CDCl}_3$ )  $\delta$  16.7 (t, 2C), 21.7 (q, 4C), 30.7 (t, 2C), 55.2 (q, 2C), 91.7 (t), 114.3 (d, 4C), 116.7 (d, 4C), 128.0 (s, 2C), 128.8 (d, 4C), 129.0 (d, 8C), 133.9 (s, 4C), 135.1 (d, 8C), 136.4 (d, 4C), 138.8 (s, 4C), 139.0 (s, 2C), 155.4 (s, 2C), 160.5 (s, 2C); IR ( $\text{CH}_2\text{Cl}_2$  cell) 3015-2920 (C-H), 1593, 1568, 1509, 1464, 1442, 1281, 1247, 1209  $\text{cm}^{-1}$ ; MS (EI+)  $m/z$  978 (M-2H<sup>+</sup>); HRMS calcd. for  $\text{C}_{59}\text{H}_{60}\text{Ge}^{74}_2\text{O}_4$  ( $\text{M}^+$ ) 980.2915, found 980.2919; Anal. calcd. for  $\text{C}_{59}\text{H}_{60}\text{Ge}_2\text{O}_4$ : C 72.4, H 6.4, found C 72.5, H 6.4.

**{2-[4-(2-Ethoxy)phenyl]ethyl}diethyl-[4-(*n*-hexyl)thiophen-2-yl]germane 10b.** To germynyl-*p*-anisole **9b** (161 mg, 374  $\mu\text{mol}$ ) was added HCl (5.00 mL, 1.0 M, 5.00 mmol) in  $\text{Et}_2\text{O}$  and the reaction mixture left to stir for 1.5 h. The solvent was then removed *in vacuo* to give the crude germynyl chloride as a brown oil. In a separate flask, a solution of LDA (925

<sup>§</sup> This acetal dimer is formed readily under the Williamson etherification reactions conditions if  $\text{CH}_2\text{Cl}_2$  is carried through from the previous step (as happened in this reaction). The reaction of phenolates with  $\text{CH}_2\text{Cl}_2$  in this fashion has been reported previously. See ref 3 (pp47).

$\mu\text{L}$ , 2.0 M, 1.85 mmol) in hexanes/THF/ethylbenzene (6/5/3) was added dropwise to a degassed solution of 3-(*n*-hexyl)thiophene (311 mg, 1.85 mmol) in THF (3 mL) at  $-50\text{ }^{\circ}\text{C}$ . This solution was warmed to  $-40\text{ }^{\circ}\text{C}$ , stirred for 40 min at this temperature and recooled to  $-50\text{ }^{\circ}\text{C}$  before being transferred by cannula to a degassed solution of the crude germyl chloride in THF (2mL) at  $-50\text{ }^{\circ}\text{C}$ . The resulting mixture was stirred for 1 h at  $-40\text{ }^{\circ}\text{C}$ , warmed to RT and stirred for a further 1 h. After quenching with sat.  $\text{NH}_4\text{Cl}$  (aq) (100 mL), the mixture was extracted with  $\text{Et}_2\text{O}$  ( $3 \times 100\text{ mL}$ ), the combined organic extracts dried ( $\text{MgSO}_4$ ) and the solvent removed *in vacuo*. The residue was purified by FC (petrol/EtOAc, 19/1) to give diethylgermylthiophene **10b** as a yellow oil (132 mg, 72%).  $R_f$  0.40 (petrol/EtOAc, 9/1);  $^1\text{H}$  NMR (250 MHz,  $\text{CDCl}_3$ ):  $\delta$  0.85 (t,  $J = 7$ , 3H), 0.90–1.37 (21H), 1.62 (t,  $J = 7.5$ , 2H), 2.59–2.72 (4H), 3.59 (q,  $J = 7$ , 2H), 3.78 (t,  $J = 5$ , 2H), 4.09 (t,  $J = 5$ , 2H), 6.83 (d,  $J = 8.5$ , 2H), 6.96 (s, 1H), 7.06 (s, 1H), 7.11 (d,  $J = 8.5$ , 2H);  $^{13}\text{C}$  NMR (62.8 MHz,  $\text{CDCl}_3$ )  $\delta$  6.0 (t, 2C), 8.9 (q, 2C), 14.1 (q), 15.2 (q), 15.5 (t), 22.7 (t), 29.2 (t), 30.1 (t), 30.2 (t), 30.7 (t), 31.7 (t), 66.8 (t), 67.5 (t), 69.1 (t), 114.6 (d, 2C), 124.5 (d), 128.7 (d, 2C), 134.5 (d), 136.8 (s), 139.6 (s), 144.5 (s), 157.0 (s); IR (neat) 2930–2870 (C-H), 1611, 1584, 1511, 1456, 1425, 1377, 1298, 1246  $\text{cm}^{-1}$ ; MS (EI+)  $m/z$  492 ( $\text{M}^+$ ); HRMS (EI+) calcd. for  $\text{C}_{26}\text{H}_{42}\text{Ge}^{74}\text{O}_2\text{S}$  ( $\text{M}^+$ ) 492.2117, found 492.2103.

**{2-[4-(2-Ethoxyethoxy)phenyl]ethyl}-[4-(*n*-hexyl)thiophen-2-yl]di-*iso*-propylgermane 10c.** To germyl-*p*-anisole **9c** (110 mg, 239  $\mu\text{mol}$ ) was added HCl (5.0 mL, 1.0 M, 5.0 mmol) in  $\text{Et}_2\text{O}$  and the reaction left to stir for 2.5 h. The solvent was then removed *in vacuo* to give crude germyl chloride as a brown oil. In a separate flask, a solution of LDA (600  $\mu\text{L}$ , 2.0 M, 1.20 mmol) in hexanes/THF/ethylbenzene (6/5/3) was added dropwise to a degassed solution of 3-(*n*-hexyl)thiophene (202 mg, 1.20 mmol) in THF (2.5 mL) at  $-50\text{ }^{\circ}\text{C}$ . This solution was warmed to  $-40\text{ }^{\circ}\text{C}$ , stirred for 40 min at this temperature and recooled to  $-50\text{ }^{\circ}\text{C}$  before being transferred by cannula to a degassed solution of the crude germyl chloride in THF (2 mL) at  $-50\text{ }^{\circ}\text{C}$ . The resulting mixture was stirred for 1 hr at  $-40\text{ }^{\circ}\text{C}$ , warmed to RT and stirred for a further 1 h. After quenching with sat.  $\text{NH}_4\text{Cl}$  (aq) (100 mL), the reaction mixture was extracted with  $\text{Et}_2\text{O}$  ( $3 \times 100\text{ mL}$ ), the combined organic extracts dried ( $\text{MgSO}_4$ ) and the solvent removed *in vacuo*. Purification by FC (petrol/EtOAc, 19/1) gave di-*iso*-propylgermylthiophene **10c** as a colourless oil (97.0 mg, 78%).  $R_f$  0.40 (petrol/EtOAc, 9/1);  $^1\text{H}$  NMR (250 MHz,  $\text{CDCl}_3$ ):  $\delta$  0.87 (t,  $J = 7$ , 3H), 1.13–1.56 (27H), 2.60–2.74 (4H), 3.59 (q,  $J = 7$ , 2H), 3.77 (t,  $J = 4.5$ , 2H), 4.10 (t,  $J = 4.5$ , 2H), 6.84 (d,  $J = 8.5$ , 2H), 6.96 (d,  $J = 1$ , 1H), 7.11 (d,  $J = 8.5$ , 2H), 7.14 (d,  $J = 1$ , 1H);  $^{13}\text{C}$  NMR (62.8 MHz,  $\text{CDCl}_3$ )  $\delta$  13.7 (t, 2C), 14.1 (q, 2C), 15.2 (q, 2C), 19.5 (q, 2C), 19.5 (q), 22.7 (t), 29.1 (t), 30.1 (t), 30.7 (t, 2C), 31.7 (t), 66.9 (t), 67.5 (t), 69.1 (t), 114.6 (d, 2C), 124.5 (d), 128.6 (d, 2C), 135.1 (s), 135.6 (d), 137.6 (s), 144.3 (s), 157.0 (s); IR (neat) 2930–2860 (C-H), 1611, 1510, 1458, 1383, 1299, 1246  $\text{cm}^{-1}$ ; MS (EI+)  $m/z$  520 ( $\text{M}^+$ ); HRMS (EI+) calcd. for  $\text{C}_{28}\text{H}_{46}\text{Ge}^{74}\text{O}_2\text{S}$  ( $\text{M}^+$ ) 520.2430, found 520.2423.

**{2-[4-(2-Ethoxy-ethoxy)-phenyl]-ethyl}-[4-(*n*-hexyl)thiophen-2-yl]diphenylgermane 10d.** To germyl-*p*-anisole **9d** (114 mg, 196  $\mu\text{mol}$ ) was added HCl in  $\text{Et}_2\text{O}$  (5.00 mL, 1.0 M, 5.00 mmol) and the reaction mixture left to stir for 16 h. The solvent was then removed *in vacuo* to give the crude germyl chloride as a colourless oil [ $^1\text{H}$  NMR (250 MHz,  $\text{CDCl}_3$ ):  $\delta$  1.28 (t,  $J = 7$ , 3H), 1.98 (m, 2H), 2.91 (m, 2H), 3.63 (q,  $J = 7$ , 2H), 3.80 (t,  $J = 5$ , 2H), 4.11 (q,  $J = 5$ , 2H), 6.85 (d,  $J = 8.5$ , 2H), 7.11 (d,  $J = 8.5$ , 2H), 7.40–7.64 (10H)];  $^{13}\text{C}$  NMR (62.8 MHz,  $\text{CDCl}_3$ )  $\delta$  15.2 (q), 21.1 (t), 29.2 (t), 66.9 (t), 67.6 (t), 69.1 (t), 114.8 (d, 2C), 128.6 (d, 4C), 128.9 (d, 2C), 130.3 (d, 2C), 133.5 (d, 4C), 135.4 (s, 2C), 135.7 (s), 157.3 (s); IR (neat) 3070–2870 (C-H), 1611, 1584, 1511, 1485, 1455, 1433, 1373, 1301, 1246  $\text{cm}^{-1}$ ; MS (EI+)  $m/z$  456 ( $\text{M}^+$ ); HRMS (EI+) calcd. for  $\text{C}_{24}\text{H}_{27}\text{ClGe}^{74}\text{O}_2$  ( $\text{M}^+$ ) 456.0911, found 456.0894.]. In a separate flask, a solution of LDA (595  $\mu\text{L}$ , 1.8 M, 1.07 mmol) in hexanes/THF/ethylbenzene (6/5/3) was added dropwise to a degassed solution of 3-(*n*-hexyl)thiophene (180 mg, 1.07 mmol) in THF (5 mL) at  $-50\text{ }^{\circ}\text{C}$ . This solution was stirred for 40 min at  $-40\text{ }^{\circ}\text{C}$ , and then

transferred by cannula to a degassed solution of the crude germylchloride (98.0 mg) in THF (5 mL) at -50 °C. The resulting mixture was stirred for 1 h at -40 °C, warmed to RT and stirred for a further 1 h. After quenching with sat. NH<sub>4</sub>Cl (aq) (100 mL), the mixture was extracted with Et<sub>2</sub>O (3 × 100 mL), the combined organic extracts dried (MgSO<sub>4</sub>) and the solvent removed *in vacuo*. The residue was purified by FC (petrol/EtOAc, 9/1) to give diphenylgermylthiophene **10d** as a yellow oil (72.1 mg, 57%). R<sub>f</sub> 0.30 (9/1, petrol/EtOAc); <sup>1</sup>H NMR (250 MHz, CDCl<sub>3</sub>) δ 0.88 (t, *J* = 6.5, 3H), 1.25 (t, *J* = 7, 3H), 1.24-1.37 (6H), 1.62 (m, 2H), 1.79 (m, 2H), 2.64 (t, *J* = 8, 2H), 2.80 (m, 2H), 3.60 (q, *J* = 7, 2H), 3.78 (t, *J* = 5, 2H), 4.09 (t, *J* = 5, 2H), 6.83 (d, *J* = 8.5, 2H), 7.04 (d, *J* = 1, 1H), 7.08 (d, *J* = 8.5, 2H), 7.23 (d, *J* = 1, 1H), 7.33-7.46 (6H), 7.51-7.57 (4H); <sup>13</sup>C NMR (62.8 MHz, CDCl<sub>3</sub>) δ 14.1 (q), 15.2 (q, 2C), 17.4 (t), 22.6 (t), 29.1 (t), 30.1 (t), 30.1 (t), 30.6 (t), 31.7 (t), 66.8 (t), 67.5 (t), 69.0 (t), 114.6 (d, 2C), 125.8 (d), 128.3 (d, 4C), 128.7 (d, 2C), 129.1 (d, 2C), 134.5 (s, 2C), 134.6 (d, 4C), 136.8 (s), 137.0 (d), 144.7 (s), 157.0 (s); IR (neat) 2930-2855 (C-H), 1611, 1584, 1510, 1485, 1455, 1431, 1373, 1300, 1246 cm<sup>-1</sup>; MS (EI+) *m/z* 588 (M<sup>+</sup>). HRMS (EI+) calcd. for C<sub>34</sub>H<sub>42</sub>Ge<sup>74</sup>O<sub>2</sub>S (M<sup>+</sup>) 588.2117, found 588.2091.

**{2-[4-(2-Ethoxyethoxy)phenyl]ethyl}-[4-(*n*-hexyl)thiophen-2-yl]di-*para*-tolylgermane 10e.** To germyl-*p*-anisole **9e** (100 mg, 180 μmol) was added HCl in Et<sub>2</sub>O (7.0 mL, 1.0 M, 7.0 mmol) and the reaction mixture left to stir for 16 h. The solvent was then removed *in vacuo* to give the crude germyl chloride as a colourless oil [<sup>1</sup>H NMR (250 MHz, CDCl<sub>3</sub>): δ 1.24 (t, *J* = 7, 3H), 1.89 (m, 2H), 2.37 (s, 6H), 2.84 (m, 2H), 3.60 (q, *J* = 7, 2H), 3.77 (t, *J* = 5, 2H), 4.08 (q, *J* = 5, 2H), 6.81 (d, *J* = 8.5, 2H), 7.07 (d, *J* = 8.5, 2H), 7.23 (d, *J* = 8, 4H), 7.45 (d, *J* = 8, 4H); <sup>13</sup>C NMR (62.8 MHz, CDCl<sub>3</sub>) δ 15.3 (q), 21.6 (t), 21.6 (q, 2C), 29.2 (t), 66.9 (t), 67.6 (t), 69.1 (t), 114.7 (d, 2C), 128.9 (d, 2C), 129.4 (d, 4C), 132.3 (s, 2C), 133.5 (d, 4C), 135.6 (s), 140.4 (s, 2C), 157.3 (s); IR (neat) 2975-2865 (C-H), 1610, 1584, 1511, 1453, 1393, 1300, 1247 cm<sup>-1</sup>; MS (EI+) *m/z* 483 (M<sup>+</sup>); HRMS (EI+) calcd. for C<sub>26</sub>H<sub>31</sub>ClGe<sup>74</sup>O<sub>2</sub> (M<sup>+</sup>) 484.1224, found 484.1207; Anal. calcd. for C<sub>26</sub>H<sub>31</sub>ClGe<sup>74</sup>O<sub>2</sub>: C 64.6, H 6.5, Cl 7.3, found C 64.1, H 6.6, Cl 7.7]. In a separate flask, a solution of LDA (3.71 mL, 2.0 M, 742 μmol) in hexanes/THF/ethylbenzene (6/5/3) was added dropwise to a degassed solution of 3-(*n*-hexyl)thiophene (124 mg, 737 μmol) in THF (5 mL) at -50 °C. This solution was stirred for 40 min at -40 °C, and then transferred by cannula to a degassed solution of the crude germylchloride (82.2 mg) in THF (5 mL) at -50 °C. The resulting mixture was stirred for 1 h at -40 °C, warmed to RT and stirred for a further 1 h. After quenching with sat. NH<sub>4</sub>Cl (aq) (100 mL), the mixture was extracted with Et<sub>2</sub>O (3 × 100 mL), the combined organic extracts dried (MgSO<sub>4</sub>) and the solvent removed *in vacuo*. The residue was purified by FC (petrol/EtOAc, 9/1) to give di-*para*-tolylgermylthiophene **10e** as a pale yellow oil (56.0 mg, 61%). R<sub>f</sub> 0.60 (3/1, petrol/EtOAc); <sup>1</sup>H NMR (250 MHz, CDCl<sub>3</sub>): δ 0.87 (t, *J* = 7, 3H), 1.21-1.63 (11H), 1.78 (m, 2H), 2.36 (s, 6H), 2.62 (t, *J* = 8, 2H), 2.77 (m, 2H), 3.59 (q, *J* = 7, 2H), 3.77 (t, *J* = 5, 2H), 4.09 (t, *J* = 5, 2H), 6.82 (d, *J* = 8.5, 2H), 7.01 (d, *J* = 1, 1H), 7.08 (d, *J* = 8.5, 2H), 7.17-7.21 (5H), 7.42 (d, *J* = 8, 4H); <sup>13</sup>C NMR (62.8 MHz, CDCl<sub>3</sub>) δ 14.1 (q), 15.2 (q), 17.5 (t), 21.5 (q, 2C), 22.7 (t), 29.1 (t), 30.1 (t), 30.2 (t), 30.6 (t), 31.7 (t), 66.9 (t), 67.5 (t), 69.0 (t), 114.6 (d, 2C), 125.7 (d), 128.7 (d, 2C), 129.1 (d, 4C), 133.2 (s, 2C), 134.6 (d, 4C), 135.0 (s), 136.8 (s), 136.9 (d), 138.9 (s, 2C), 144.6 (s), 157.0 (s); IR (neat) 2926-2857 (C-H), 1686, 1610, 1584, 1510, 1485, 1455, 1392, 1299, 1246 cm<sup>-1</sup>; MS (EI+) *m/z* 616 (M<sup>+</sup>); HRMS (EI+) calcd. for C<sub>36</sub>H<sub>46</sub>Ge<sup>74</sup>O<sub>2</sub>S (M<sup>+</sup>) 616.2430, found 616.2428.

***tert*-Butyl-[4-(*n*-hexyl)thiophen-2-yl]dimethylsilane 12.** A solution of LDA (3.12 mL, 2.0 M, 6.24 mmol) in hexanes/ethylbenzene/THF (6/5/3) was added dropwise to a degassed solution of 3-(*n*-hexyl)thiophene (**7**) (1.00 g, 5.94 mmol) in THF (10 mL) at -50 °C to give an orange solution. After stirring for 40 min at -40 °C, a degassed solution of *tert*-butyldimethylsilyl chloride (1.34 g, 8.89 mmol) in THF (5 mL) was added by cannula at -50 °C. The resulting mixture was warmed to -40 °C, stirred for 30 min at this temperature, warmed to RT and stirred for a further 40 min to

give a yellow solution. After quenching with sat.  $\text{NH}_4\text{Cl}$  (aq) (50 mL), the mixture was extracted with  $\text{Et}_2\text{O}$  ( $3 \times 50$  mL), the combined organic extracts dried ( $\text{MgSO}_4$ ) and the solvent removed *in vacuo*. Purification by vacuum distillation (105 °C,  $10^{-3}$  Torr) removed starting material. Further purification by HPLC (Jupiter ODS-C18 column, UV 254 nm detection,  $1 \text{ mL min}^{-1}$ , 5  $\rightarrow$  100% MeCN in  $\text{H}_2\text{O}$  + 0.1% formic acid,  $R_t = 14.2$  min) gave silylthiophene **12** as a colourless oil (1.05 g, 62%).  $R_f$  (pentane) 0.85;  $^1\text{H}$  NMR (250 MHz,  $\text{CDCl}_3$ ):  $\delta$  0.27 (s, 6H), 0.87 (t,  $J = 7.5$ , 3H), 0.90 (s, 9H), 1.24-1.30 (6H), 1.61 (t,  $J = 8$ , 2H), 2.62 (t,  $J = 8$ , 2H), 7.15 (s, 1H), 7.25 (s, 1H);  $^{13}\text{C}$  NMR (62.8 MHz,  $\text{CDCl}_3$ )  $\delta$  -4.9 (q, 2C), 14.2 (q), 16.9 (s), 22.7 (t), 26.4 (q, 3C), 29.1 (t), 30.0 (t), 30.7 (t), 31.7 (t), 125.4 (d), 136.6 (d), 136.9 (s), 144.5 (s); IR (neat) 2955-2855 (C-H), 1462, 1406, 1361, 1249 [ $\text{Si}(\text{CH}_3)_n$ ]  $\text{cm}^{-1}$ ; MS (EI+)  $m/z$  282 ( $\text{M}^+$ ); HRMS (EI+) calcd. for  $\text{C}_{16}\text{H}_{30}\text{SSi}$  ( $\text{M}^+$ ) 282.1838, found 282.1827; Anal. calcd. for  $\text{C}_{16}\text{H}_{30}\text{SSi}$ : C 68.0, H 10.7, S 11.4, found C 68.5, H 11.0, S 11.5.

**tert-Butyl-5-({2-[4-(2-ethoxyethoxy)phenyl]ethyl}di-*para*-tolylgermany)-[4-(*n*-hexyl)thiophen-2-yl]dimethylsilane 13.** A solution of LDA (730  $\mu\text{L}$ , 2.0 M, 1.46 mmol) in hexanes/THF/ethylbenzene (6/5/3) was added dropwise to a degassed solution of silylthiophene **12** (360 mg, 1.27 mmol) in THF (40 mL) at -50 °C. This solution was warmed to -40 °C, stirred for 40 min at this temperature and re-cooled to -50 °C before being transferred by cannula to a degassed solution of the germylechloride obtained from treatment of *p*-anisylgermane **9e** with HCl in  $\text{Et}_2\text{O}$  (as described in the preparation of **10e**, above) (411 mg, 848  $\mu\text{mol}$ ) in THF (40 mL) at -50 °C. The resulting mixture was stirred for 1 h at -40 °C, warmed to RT and stirred for a further 1 h. After quenching with sat.  $\text{NH}_4\text{Cl}$  (aq) (100 mL), the mixture was extracted with  $\text{Et}_2\text{O}$  ( $3 \times 100$  mL), the combined organic extracts dried ( $\text{MgSO}_4$ ) and the solvent removed *in vacuo*. The residue was purified by FC (petrol/ $\text{EtOAc}$ , 9/1) to give germylethiophene **13** as a pale yellow oil (456 mg, 73%).  $R_f$  0.30 (9/1, petrol/ $\text{EtOAc}$ );  $^1\text{H}$  NMR (250 MHz,  $\text{CDCl}_3$ ):  $\delta$  0.27 (s, 6H), 0.78 (t,  $J = 7.5$ , 3H), 0.80-1.26 (m, 20H), 1.80 (m, 2H), 2.35 (s, 8H), 2.71 (m, 2H), 3.59 (q,  $J = 7$ , 2H), 3.76 (t,  $J = 5$ , 2H), 4.08 (q,  $J = 5$ , 2H), 6.81 (d,  $J = 8.5$ , 2H), 7.05 (d,  $J = 8.5$ , 2H), 7.17 (d,  $J = 8$ , 4H), 7.18 (s, 1H), 7.39 (d,  $J = 8$ , 4H);  $^{13}\text{C}$  NMR (62.8 MHz,  $\text{CDCl}_3$ )  $\delta$  -4.6 (q, 2C), 14.2 (q, 1C), 15.4 (q, 1C), 17.1 [s, 1C], 18.4/ 22.7/ 29.4/ 30.5/ 31.4/ 31.7/ 31.8 (t, 14H), 21.6 (q, 2C), 26.6 (q, 3C), 66.9 (t, 1C), 67.6 (t, 1C), 69.2 (t, 1C), 114.7 (d, 2C), 128.9 (d, 2C), 129.2 (d, 4C), 133.6 (s, 2C), 134.6 (s, 1C), 134.9 (d, 4C), 137.2 (s, 1C), 138.1 (d, 1C), 138.8 (s, 22C), 142.4 (s, 1C), 151.7 (s, 1C), 157.1 [s, 1C]; IR (neat) 2955-2855 (C-H), 1610, 1509, 1457, 1391, 1300, 1278, 1250 [ $\text{Si}(\text{CH}_3)_n$ ]  $\text{cm}^{-1}$ ; MS (EI+)  $m/z$  730 ( $\text{M}^+$ ). HRMS (EI+) calcd. for  $\text{C}_{42}\text{H}_{60}\text{Ge}^{74}\text{O}_2\text{SSi}$  ( $\text{M}^+$ ) 730.3295, found 730.3298.

**{2-[4-(2-Ethoxyethoxy)phenyl]ethyl}-[3-(*n*-hexyl)thiophen-2-yl]di-*para*-tolylgermane 14.** To silylthiophene **13** (225 mg, 308  $\mu\text{mol}$ ) in DMF (3 mL) was added caesium fluoride (234 mg, 1.54 mmol) and the mixture left to stir for 24 h at 110 °C. The reaction mixture was partitioned between  $\text{Et}_2\text{O}$  (40 mL) and  $\text{H}_2\text{O}$  (75 mL) and the  $\text{Et}_2\text{O}$  layer extracted with  $\text{H}_2\text{O}$  ( $3 \times 40$  mL). The organic layer was dried ( $\text{MgSO}_4$ ), the solvent removed *in vacuo* and the residue purified by FC (petrol/ $\text{EtOAc}$ , 9/1) to give germylethiophene **14** as a pale yellow oil (182 mg, 95%).  $R_f$  0.30 (petrol/ $\text{EtOAc}$ , 9/1);  $^1\text{H}$  NMR (250 MHz,  $\text{CDCl}_3$ ):  $\delta$  0.81 (t,  $J = 7.5$ , 3H), 0.83-1.37 (11H), 1.84 (m, 2H), 2.35 (s, 6H), 2.44 (t,  $J = 8$ , 2H), 2.78 (m, 2H), 3.61 (q,  $J = 7$ , 2H), 3.79 (t,  $J = 5$ , 2H), 4.10 (q,  $J = 5$ , 2H), 6.84 (d,  $J = 8.5$ , 2H), 7.09 (d,  $J = 8.5$ , 2H), 7.12 (d,  $J = 5$ , 1H), 7.20 (d,  $J = 8$ , 4H), 7.43 (d,  $J = 8$ , 4H), 7.54 (d,  $J = 5$ , 1H);  $^{13}\text{C}$  NMR (62.8 MHz,  $\text{CDCl}_3$ )  $\delta$  14.3 (q), 15.4 (q), 18.4 (t), 21.6 (q, 2C), 22.7 (t), 29.4 (t), 30.6 (t), 31.6 (t), 31.8 (t), 31.8 (t), 67.0 (t), 67.7 (t), 69.2 (t), 114.8 (d, 2C), 128.9 (d, 2C), 129.2 (d, 4C), 130.1 (d), 130.3 (d), 133.5 (s, 2C), 134.9 (d, 4C; s), 137.1 (s), 139.0 (s, 2C), 150.8 (s), 157.2 (s); IR (neat) 2930-2860 (C-H), 1610, 1510, 1457, 1392, 1300, 1258, 1245  $\text{cm}^{-1}$ ; MS (EI+)  $m/z$  616 ( $\text{M}^+$ ); HRMS (EI+) calcd. for  $\text{C}_{36}\text{H}_{46}\text{Ge}^{74}\text{O}_2\text{S}$  ( $\text{M}^+$ ) 616.2430, found 616.2435.

**2-[4-(2-Ethoxyethoxy)phenyl]ethyl-[3-(*n*-hexyl)-5-iodothiophen-2-yl]di-*para*-tolylgermane 15.** A solution of LDA (545  $\mu$ L, 2.0 M, 1.09 mmol) in hexanes/THF/ethylbenzene (6/5/3) was added dropwise to a solution of germylthiophene **14** (224 mg, 36.4  $\mu$ mol) in THF (3 mL) at -50 °C. After stirring for 40 min at -40 °C, a solution of degassed 1,2-diiodoethane (1.56 g, 5.53 mmol) in THF (2 mL) was added by cannula at -50 °C. The resulting mixture was stirred in the dark for 1 h at -40 °C, warmed to RT and stirred for a further 1 h. The reaction mixture was partitioned between sat. Na<sub>2</sub>S<sub>2</sub>O<sub>3</sub> (aq) (200 mL) and Et<sub>2</sub>O (100 mL), extracted with Et<sub>2</sub>O (2  $\times$  100 mL), the organic fractions combined and then dried (MgSO<sub>4</sub>). The solvent was removed *in vacuo* and the residue purified by FC (petrol/EtOAc, 9/1) to give iodide **15** as a pale yellow oil (251 mg, 90%). R<sub>f</sub> 0.50 (petrol/EtOAc, 9/1); <sup>1</sup>H NMR (250 MHz, CDCl<sub>3</sub>):  $\delta$  0.79 (t, *J* = 7, 3H), 0.87-1.30 (11H), 1.80 (m, 2H), 2.34-2.41 (8H), 2.75 (m, 2H), 3.60 (q, *J* = 7, 2H), 3.78 (t, *J* = 5, 2H), 4.09 (q, *J* = 5, 2H), 6.82 (d, *J* = 8.5, 2H), 7.06 (d, *J* = 8.5, 2H), 7.17 (s, 1H), 7.19 (d, *J* = 8, 4H), 7.38 (d, *J* = 8, 4H); <sup>13</sup>C NMR (62.8 MHz, CDCl<sub>3</sub>)  $\delta$  14.2 (q), 15.3 (q), 18.2 (t), 21.6 (q, 2C), 22.6 (t), 29.2 (t), 30.4 (t), 31.3 (t), 31.5 (t), 31.7 (t), 66.9 (t), 67.6 (t), 69.1 (t), 77.7 (s), 114.7 (d, 2C), 128.8 (d, 2C), 129.2 (d, 4C), 132.8 (s, 2C), 134.7 (d, 4C; s), 136.7 (s), 139.2 (s, 2C), 139.8 (d), 152.7 (s), 157.1 (s); IR (neat) 2925-2855 (C-H), 1610, 1510, 1454, 1393, 1299, 1246 cm<sup>-1</sup>; MS (ES+) *m/z* 765 (MNa<sup>+</sup>); HRMS (ES+) calcd. for C<sub>36</sub>H<sub>45</sub>Ge<sup>74</sup>INaO<sub>2</sub>S (MNa<sup>+</sup>) 765.1295, found 765.1266.

**2-[5-(*tert*-Butyldimethylsilylanyl)-3-(*n*-hexyl)thiophen-2-yl]-4,4,5,5-tetramethyl-[1,2,3]dioxaborolane 16.** A solution of LDA (1.33 mL, 2.0 M, 2.66 mmol) in hexanes/ethylbenzene/THF (6/5/3) was added dropwise to a solution of silylthiophene **12** (501 mg, 1.77 mmol) in THF (5 mL) at -50 °C and then warmed to -40 °C give an orange solution. After stirring for 40 min at this temperature the reaction mixture was cooled to -50 °C and a solution of 2-*isopropoxy*-4,4,5,5-tetramethyl-[1,3,2]dioxaborolane (162 mg, 871  $\mu$ mol) in THF (1 mL) was added dropwise by cannula. The resulting mixture was stirred for 30min at -40 °C, warmed to RT and stirred for a further 15 min. The reaction mixture was then cooled to 0 °C and anhydrous HCl (710  $\mu$ L, 1.0 M, 710  $\mu$ mol) in Et<sub>2</sub>O added. The mixture was left to stir at this temperature for 15 min and then allowed to warm to RT. The solvent was removed *in vacuo* and the residue dissolved in dry Et<sub>2</sub>O (50 mL). The solution was passed through a pad of dry Celite<sup>TM</sup>, dried (MgSO<sub>4</sub>) and the solvent removed *in vacuo*. The residue was purified by FC (petrol/ CH<sub>2</sub>Cl<sub>2</sub>, 3/1) to give boronic ester **16** as a pale yellow oil (371 mg, 51%). R<sub>f</sub> 0.40 (3:1, petrol/ CH<sub>2</sub>Cl<sub>2</sub>); <sup>1</sup>H NMR (250 MHz, CDCl<sub>3</sub>):  $\delta$  0.26 (s, 6H), 0.87 (t, *J* = 7, 3H), 0.90 (s, 9H), 1.27-1.32 (18H), 1.57 (t, *J* = 8, 2H), 2.87 (t, *J* = 8, 2H), 7.12 (s, 1H); <sup>13</sup>C NMR (62.8 MHz, CDCl<sub>3</sub>)  $\delta$  -4.8 (q, 2C), 14.2 (q), 16.9 (s), 22.7 (t), 24.9 (q, 4C), 26.4 (q, 3C), 29.1 (t), 30.0 (t), 31.7 (t), 32.0 (t), 83.4 (s, 2C), 138.4 (d), 144.9 (s), 155.3 (s), (absent: CB); IR (neat) 2955-2855 (C-H), 1525, 1470, 1435, 1370, 1332, 1298, 1271, 1250 [Si(CH<sub>3</sub>)<sub>n</sub>], 1214 cm<sup>-1</sup>; MS (ES+) *m/z* 409 (MH<sup>+</sup>); HRMS (ES+) calcd. for C<sub>22</sub>H<sub>42</sub>BO<sub>2</sub>SSi (MH<sup>+</sup>) 409.2768, found 409.2770.

***tert*-Butyl-[5'-({2-[4-(2-ethoxyethoxy)phenyl]ethyl}-di-*para*-tolylgermany)-3,4'-dihexithiophenyl-5-yl]dimethylsilane 17.** To a degassed solution of boronic ester **16** (256 mg, 627  $\mu$ mol), K<sub>3</sub>PO<sub>4</sub> (427mg, 3.14mmol) and iodide **15** (155 mg, 203  $\mu$ mol) in DMF (1 mL) was added [Pd(PPh<sub>3</sub>)<sub>4</sub>] (23.1 mg, 20.0  $\mu$ mol) and the resulting mixture stirred at 60 °C for 24 h. The reaction mixture was partitioned between H<sub>2</sub>O (100 mL) and Et<sub>2</sub>O (50 mL), extracted with Et<sub>2</sub>O (2  $\times$  50 mL) and the organic fractions combined and dried (MgSO<sub>4</sub>). The solvent was removed *in vacuo* and the residue purified by FC (petrol/CH<sub>2</sub>Cl<sub>2</sub>, 2/1) to give germylbithiophene **17** as a yellow oil (112 mg, 60%). R<sub>f</sub> 0.50 (petrol/ CH<sub>2</sub>Cl<sub>2</sub>, 2/1); <sup>1</sup>H NMR (250 MHz, CDCl<sub>3</sub>):  $\delta$  0.27 (s, 6H), 0.75-1.36 (34H), 1.80 (m, 2H), 2.32-2.39 (8H), 2.71-2.80 (4H), 3.59 (q, *J* = 7, 2H), 3.76 (t, *J* = 5, 2H), 4.08 (q, *J* = 5, 2H), 6.82 (d, *J* = 8.5, 2H), 6.99 (s, 1H), 7.07 (d, *J* = 8.5, 2H), 7.11 (s, 1H), 7.18 (d, *J* = 8, 4H), 7.42 (d, *J* = 8, 4H); <sup>13</sup>C NMR (62.8 MHz, CDCl<sub>3</sub>)  $\delta$  -5.0 (q, 2C), 14.1 (q, 2C), 15.2 (q), 16.9 (s), 18.2 (t), 21.5 (q, 2C), 22.6 (t), 22.7 (t), 26.4 (q, 3C), 29.3 (t), 29.3 (t, 2C), 30.4 (t), 30.7 (t), 31.3 (t), 31.7 (t, 2C),



31.8 (t), 66.8 (t), 67.5 (t), 69.1 (t), 114.6 (d, 2C), 128.4 (d), 128.7 (d, 2C), 129.0 (s), 129.1 (d, 4C), 133.3 (s, 2C), 134.7 (d, 4C), 135.1 (s), 136.5 (s), 137.0 (s), 138.3 (d), 138.9 (s, 2C), 140.2 (s), 141.1 (s), 151.0 (s), 157.0 (s); IR (neat) 2924-2854 (C-H), 1610, 1509, 1455, 1390, 1246 [Si(CH<sub>3</sub>)<sub>n</sub>] cm<sup>-1</sup>; MS (EI+) *m/z* 896 (M<sup>+</sup>). HRMS (ES+) calcd. for C<sub>52</sub>H<sub>74</sub>Ge<sup>74</sup>NaO<sub>2</sub>S<sub>2</sub>Si (MNa<sup>+</sup>) 919.4009, found 919.4001.

**[4,3'-Di-(*n*-hexyl)-[2,2']bithiophenyl-5-yl]-[2-[4-(2-ethoxyethoxy)phenyl]ethyl]di-*para*-tolylgermane 18.** To silylthiophene **17** (60.0 mg, 86.0 μmol) in DMF (1 mL) was added caesium fluoride (63.4 mg, 0.42 mmol) and the mixture left to stir for 24 hrs at 110 °C. The reaction mixture was partitioned between Et<sub>2</sub>O (50 mL) and H<sub>2</sub>O (100 mL) and the Et<sub>2</sub>O layer extracted with H<sub>2</sub>O (3 × 50 mL). The organic layer was dried (MgSO<sub>4</sub>), the solvent removed *in vacuo* and the residue purified by FC (petrol/EtOAc, 9/1) to give germylbithiophene **18** as a brown oil (54.0 mg, 99%). *R<sub>f</sub>* 0.30 (petrol/EtOAc, 3/1); <sup>1</sup>H NMR (250 MHz, CDCl<sub>3</sub>): δ 0.75-1.65 (25H), 1.82 (m, 2H), 2.40-2.55 (8H), 2.70-2.81 (4H), 3.59 (q, *J* = 7, 2H), 3.76 (t, *J* = 5, 2H), 4.08 (q, *J* = 5, 2H), 6.82 (d, *J* = 8.5, 2H), 6.89 (d, *J* = 5, 1H), 7.05-7.20 (8H), 7.43 (d, *J* = 8.5, 4H); <sup>13</sup>C NMR (62.8 MHz, CDCl<sub>3</sub>) δ 14.1 (q, 2C), 15.2 (q), 18.2 (t), 21.5 (q, 2C), 22.6 (t), 22.7 (t), 29.2 (t, 2C), 29.3 (t), 30.4 (t), 30.7 (t), 31.3 (t), 31.7 (t, 2C), 31.8 (t), 66.8 (t), 67.5 (t), 69.1 (t), 98.3 (s), 114.6 (d, 2C), 123.3 (d), 128.7 (d, 2C), 129.1 (d, 4C), 130.0 (d), 131.1 (s), 132.0 (d), 133.2 (s, 2C), 134.7 (d, 4C), 137.0 (s), 138.9 (s, 2C), 139.2 (s), 140.9 (s), 151.0 (s), 157.0 (s); IR (neat) 2925-2850, 1609, 1509, 1454, 1391, 1244 cm<sup>-1</sup>; MS (ES+) *m/z* 805 (MNa<sup>+</sup>). HRMS (ES+) calcd. for C<sub>46</sub>H<sub>60</sub>Ge<sup>74</sup>NaO<sub>2</sub>S<sub>2</sub> (MNa<sup>+</sup>) 805.3144, found 805.3174.

**3,4'-Di-(*n*-hexyl)-[2,2']bithiophene 19.**<sup>4</sup> *Method 2:* To germylthiophene **18** (20.1 mg, 25.7 μmol) was added a solution of TFA in CH<sub>2</sub>Cl<sub>2</sub> (33% v/v, 1.5 mL) and the mixture left to stir at RT for 1 h. The solvent was then removed *in vacuo* and the residue purified by FC (pentane) to give bithiophene **19** as a yellow oil (8.3 mg, 97%). Spectroscopic data as in main manuscript.

**2-[3-(*n*-Hexyl)thiophen-2-yl]-4,4,5,5-tetramethyl-[1,3,2]dioxaborolane 20.** To a solution of germylthiophene **14** (28.2 mg, 45.7 μmol) and propylene oxide (1.00 mL, 990 μmol) in CH<sub>2</sub>Cl<sub>2</sub> (1 mL) at -78 °C was added boron trichloride (99.0 μL, 1.0 M, 14.3 mmol) in heptane. After stirring for 40 min at this temperature, anhydrous pinacol (41.0 mg, 347 μmol) was added and the reaction mixture allowed to warm to RT. The solvent was then removed *in vacuo* and the residue purified by FC (petrol/EtOAc, 19/1) to give boronic ester **20** as a yellow oil (4.1 mg, 30%). *R<sub>f</sub>* 0.50 (9/1, petrol/EtOAc); <sup>1</sup>H NMR (250 MHz, CDCl<sub>3</sub>): δ 0.87 (t, *J* = 6.5, 3H), 1.23-1.30 (6H), 1.32 (s, 12H), 1.55 (m, 2H), 2.87 (t, *J* = 8, 2H), 7.00 (d, *J* = 4.5, 1H), 7.47 (d, *J* = 4.5, 1H); <sup>13</sup>C NMR (62.8 MHz, CDCl<sub>3</sub>) δ 14.3 (q), 22.7 (t), 24.9 (q, 4C), 29.1 (t), 30.2 (t), 31.8 (t), 31.9 (t), 83.6 (s, 2C), 130.4 (d), 131.4 (d), 154.8 (s), (absent: CB); IR (neat) 2930-2855 (C-H), 1530, 1435, 1373, 1337, 1272, 1215 cm<sup>-1</sup>; MS (EI+) *m/z* 294 (M<sup>+</sup>); HRMS calcd. for C<sub>16</sub>H<sub>27</sub>BO<sub>2</sub>S (M<sup>+</sup>) 294.1825, found 294.1811.

**2-[2-(2-*para*-Tolyloxyethoxy)ethoxy]ethanol 23.** To a solution of *p*-cresol (**21**, 1.28 g, 11.8 mmol) in acetonitrile (12 mL) was added 2-[2-(2-chloroethoxy)ethoxy]ethanol (**22**, 862 μL, 5.93 mmol), TBAI (438 mg, 1.19 mmol) and caesium carbonate (4.06 g, 11.5 mmol). The mixture was refluxed at 85 °C for 17 h then cooled and filtered. The solvent was removed *in vacuo* and the residue purified by FC (petrol/EtOAc, 9/1) to give alcohol **23** as a colourless oil (2.16 g, 76%). *R<sub>f</sub>* 0.55 (petrol/EtOAc, 3/1); <sup>1</sup>H NMR (250 MHz, CDCl<sub>3</sub>): δ 2.27 (s, 3H), 3.62 (m, 2H), 3.67-3.76 (6H), 3.85 (t, *J* = 4.5, 2H), 4.10 (t, *J* = 4.5, 2H), 6.81 (d, *J* = 8.5, 2H), 7.07 (d, *J* = 8.5, 2H); <sup>13</sup>C NMR (62.8 MHz, CDCl<sub>3</sub>) δ 20.5 (q), 61.7 (t), 67.4 (t), 69.8 (t), 70.3 (t), 70.8 (t), 72.6 (t), 114.5 (d, 2C), 129.9 (d, 2C), 130.1 (s), 156.6 (s); IR (neat) 3436 (broad, O-H), 2925-2870 (C-H), 1614, 1586, 1512, 1456, 1245 cm<sup>-1</sup>; MS (EI+) *m/z* 240 (M<sup>+</sup>); HRMS calcd. for C<sub>13</sub>H<sub>20</sub>O<sub>4</sub> (M<sup>+</sup>) 240.1362, found 240.1368.

**1-[2-[2-(2-Chloroethoxy)ethoxy]ethoxy]-4-methylbenzene 24** and **formic acid 2-[2-(2-*para*-tolylxyethoxy)ethoxy]ethyl ester 25**. To a solution of the alcohol **23** (100 mg, 416  $\mu\text{mol}$ ) in  $\text{CH}_2\text{Cl}_2$  (5 mL) at RT was added thionyl chloride (152  $\mu\text{L}$ , 2.08 mmol) and DMF (6.2  $\mu\text{L}$ , 80.0 mmol) and the mixture left to stir for 24 h. The solvent was removed *in vacuo* and the residue purified by FC (petrol/EtOAc, 4/1) to give:

*Chloride 24* as a colourless oil (95.8 mg, 89%):  $R_f$  0.55 (petrol/EtOAc, 1/1);  $^1\text{H NMR}$  (250 MHz,  $\text{CDCl}_3$ ):  $\delta$  2.27 (s, 3H), 3.46 (t,  $J = 6.5$ , 2H), 3.67-3.77 (4H), 3.77-3.87 (4H), 4.10 (t,  $J = 4.5$ , 2H), 6.81 (d,  $J = 8.5$ , 2H), 7.07 (d,  $J = 8.5$ , 2H);  $^{13}\text{C NMR}$  (62.8 MHz,  $\text{CDCl}_3$ )  $\delta$  20.5 (q), 30.4 (t), 67.5 (t), 69.9 (t), 70.6 (t), 70.8 (t), 71.3 (t), 114.5 (d, 2C), 129.9 (d, 2C), 130.1 (s), 156.6 (s); IR (neat) 2925-2870 (C-H), 1614, 1586, 1512, 1456, 1245  $\text{cm}^{-1}$ ; MS (EI+)  $m/z$  302 ( $\text{M}^+$ ); HRMS calcd. for  $\text{C}_{13}\text{H}_{19}\text{BrO}_3$  ( $\text{M}^+$ ) 302.0518, found 302.0503.

*Formate ester 25* as a colourless oil (10.0 mg, 9%):  $R_f$  0.70 (petrol/EtOAc, 3/1);  $^1\text{H NMR}$  (250 MHz,  $\text{CDCl}_3$ ):  $\delta$  2.26 (s, 3H), 3.65-3.75 (6H), 3.83 (t,  $J = 5$ , 2H), 4.10 (t,  $J = 5$ , 2H), 4.31 (t,  $J = 5$ , 2H), 6.80 (d,  $J = 8.5$ , 2H), 7.06 (d,  $J = 8.5$ , 2H), 8.06 (s, 1H); MS (EI+)  $m/z$  268 ( $\text{M}^+$ ); HRMS calcd. for  $\text{C}_{14}\text{H}_{20}\text{O}_5$  ( $\text{M}^+$ ) 268.1311, found 268.1315.

**1-[2-[2-(2-Bromoethoxy)ethoxy]ethoxy]-4-methylbenzene 26**. To a solution of the alcohol **23** (98.0 mg, 408  $\mu\text{mol}$ ) in  $\text{CH}_2\text{Cl}_2$  (5 mL) at 0  $^\circ\text{C}$  was added triphenylphosphine (214 mg, 817  $\mu\text{mol}$ ) and carbon tetrabromide (542 mg, 1.63 mmol). The yellow solution was warmed to RT and left to stir for 24 h. The solvent was then removed *in vacuo* and the residue purified by FC (petrol/EtOAc, 4/1) to give bromide **26** as a colourless oil (120 mg, 97%).  $R_f$  0.35 (petrol/EtOAc, 3/1);  $^1\text{H NMR}$  (250 MHz,  $\text{CDCl}_3$ ):  $\delta$  2.27 (s, 3H), 3.46 (t,  $J = 6.5$ , 2H), 3.67-3.77 (4H), 3.77-3.87 (4H), 4.10 (t,  $J = 4.5$ , 2H), 6.81 (d,  $J = 8.5$ , 2H), 7.07 (d,  $J = 8.5$ , 2H);  $^{13}\text{C NMR}$  (62.8 MHz,  $\text{CDCl}_3$ )  $\delta$  20.5 (q), 30.4 (t), 67.5 (t), 69.9 (t), 70.6 (t), 70.8 (t), 71.3 (t), 114.5 (d, 2C), 129.9 (d, 2C), 130.1 (s), 156.6 (s); IR (neat) 2925-2870 (C-H), 1614, 1586, 1512, 1456, 1245  $\text{cm}^{-1}$ ; MS (EI+)  $m/z$  302 ( $\text{M}^+$ ); HRMS calcd. for  $\text{C}_{13}\text{H}_{19}\text{BrO}_3$  ( $\text{M}$ ) 302.0518, found 302.0503.

**Trimethyl-[2-(4-{2-[2-(2-*para*-tolylxyethoxy)ethoxy]ethoxy}phenyl)ethyl]germane 28**. *Method 1*: To a solution of 4-(2-trimethylgermanylethyl)phenol **27**<sup>5</sup> (105 mg, 298  $\mu\text{mol}$ ) in acetonitrile (2 mL) was added chloride **24** (77.2 mg, 321  $\mu\text{mol}$ ), TBAI (15.5 mg, 42.0  $\mu\text{mol}$ ) and caesium carbonate (145 mg, 411  $\mu\text{mol}$ ). The reaction mixture was refluxed at 85  $^\circ\text{C}$  for 17 h then cooled and filtered. The solvent was removed *in vacuo* and the residue purified by FC (petrol/EtOAc, 9/1) to give ether **28** as a colourless oil (119 mg, 87%).  $R_f$  0.30 (petrol/EtOAc, 3/1);  $^1\text{H NMR}$  (250 MHz,  $\text{CDCl}_3$ ):  $\delta$  0.00 (s, 9H), 0.91 (m, 2H), 2.17 (s, 3H), 4.00 (m, 2H), 3.65 (s, 4H), 3.75 (t,  $J = 5$ , 4H), 4.00 (t,  $J = 5$ , 4H), 6.71 (d,  $J = 8.5$ , 2H), 6.72 (d,  $J = 8.5$ , 2H), 6.96 (d,  $J = 8.5$ , 2H), 6.99 (d,  $J = 8.5$ , 2H);  $^{13}\text{C NMR}$  (62.8 MHz,  $\text{CDCl}_3$ )  $\delta$  -2.4 (q, 3C), 18.8 (t), 20.5 (q), 30.3 (t), 67.5 (t, 2C), 69.9 (t, 2C), 70.9 (t, 2C), 114.5 (d, 4C), 128.7 (d, 2C), 129.9 (d, 2C), 130.0 (s), 137.4 (s), 156.7 (s), 156.8 (s); IR (neat) 2920-2870 (C-H), 1612, 1585, 1511, 1455, 1246  $\text{cm}^{-1}$ ; MS (EI+)  $m/z$  462 ( $\text{M}^+$ ); HRMS calcd. for  $\text{C}_{24}\text{H}_{36}\text{Ge}^{74}\text{O}_4$  ( $\text{M}^+$ ) 462.1825, found 462.1807.

*Method 2*: To a solution of 4-(2-trimethylgermanylethyl)phenol **27**<sup>5</sup> (54.0 mg, 178  $\mu\text{mol}$ ) in acetonitrile (2 mL) was added bromide **26** (54.0 mg, 178  $\mu\text{mol}$ ), TBAI (9.2 mg, 24.9  $\mu\text{mol}$ ) and caesium carbonate (87.3 mg, 247  $\mu\text{mol}$ ). The mixture was refluxed at 85  $^\circ\text{C}$  for 17 h then cooled and filtered. The solvent was removed *in vacuo* and the residue purified by FC (petrol/EtOAc, 9/1) to give the ether **28** as a colourless oil (70.1 mg, 84%) Spectroscopic data as above.

**Triethyl-[3-(*n*-hexyl)thiophen-2-yl]silane 1b.**

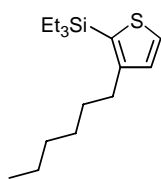

C<sub>16</sub>H<sub>30</sub>SSi  
Mol. Wt.: 282.56

**<sup>1</sup>H NMR (250 MHz, CDCl<sub>3</sub>)**

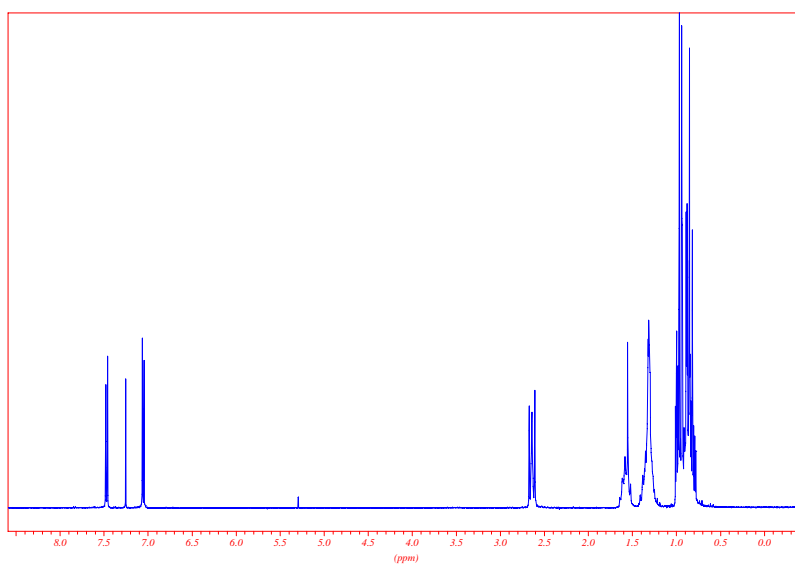

**<sup>13</sup>C NMR APT (62.8 MHz, CDCl<sub>3</sub>)**

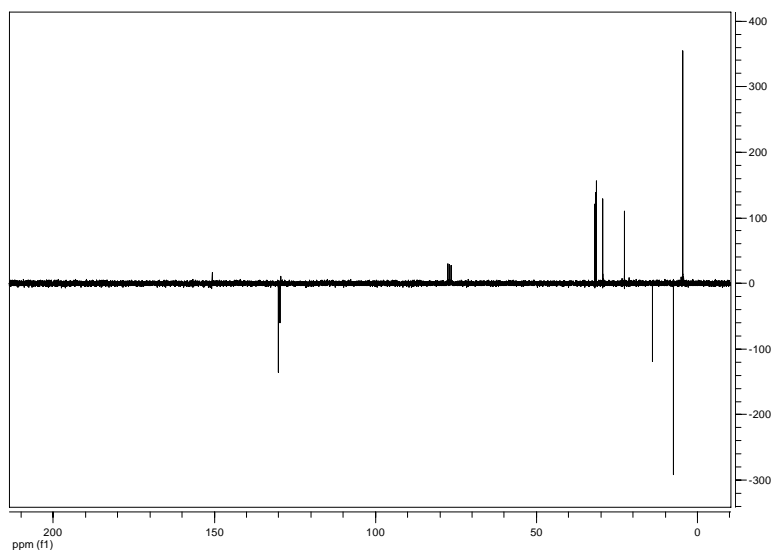

***tert*-Butyl-[3-(*n*-hexyl)thiophen-2-yl]dimethylsilane 1c.**

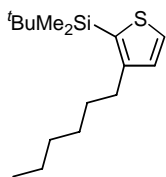

C<sub>16</sub>H<sub>30</sub>SSi  
Mol. Wt.: 282.56

**<sup>1</sup>H NMR (250 MHz, CDCl<sub>3</sub>)**

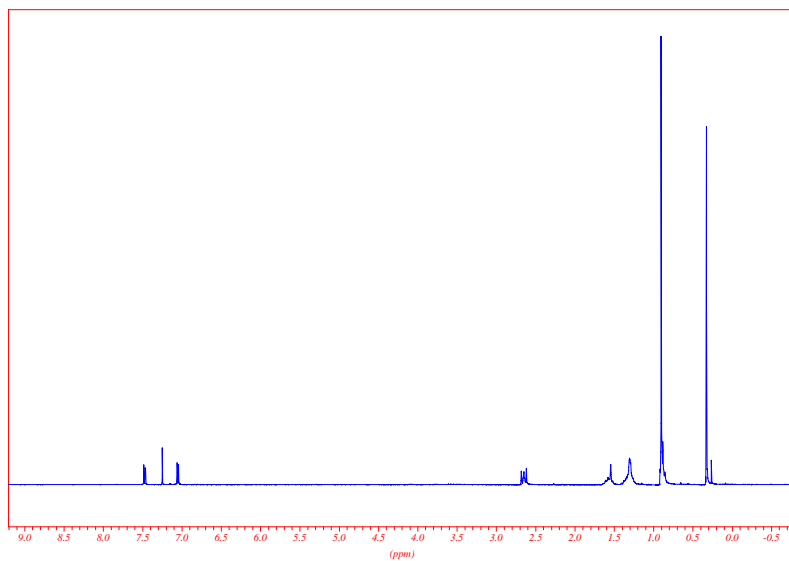

**<sup>13</sup>C NMR APT (62.8 MHz, CDCl<sub>3</sub>)**

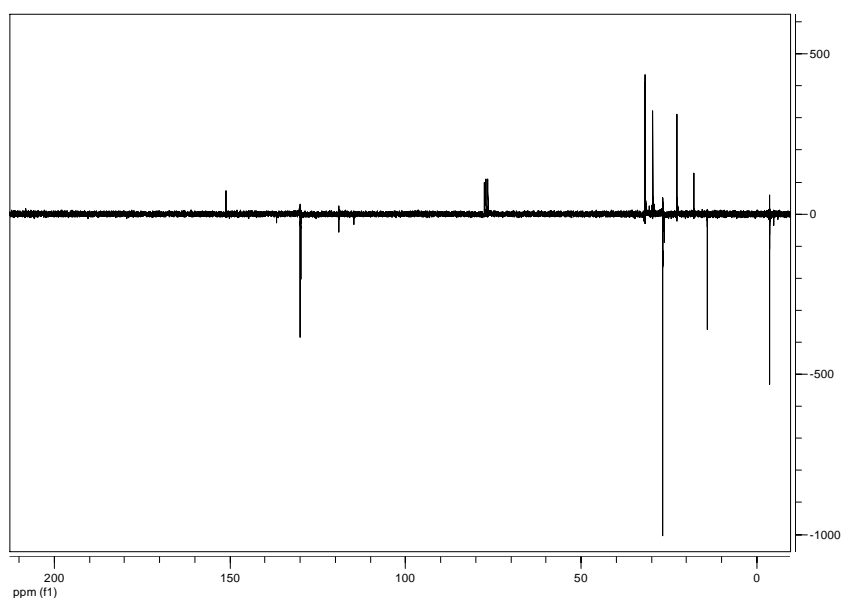

**4-{2-[(4-Methoxyphenyl)dimethylgermyl]ethyl}phenol 8a.**

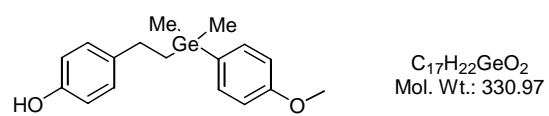

**$^1H$  NMR (250 MHz,  $CDCl_3$ )**

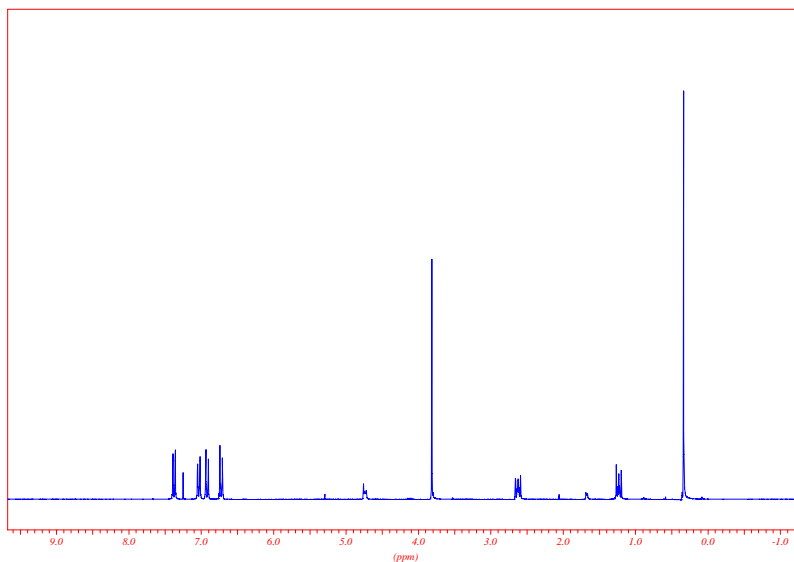

**$^{13}C$  NMR APT (62.8 MHz,  $CDCl_3$ )**

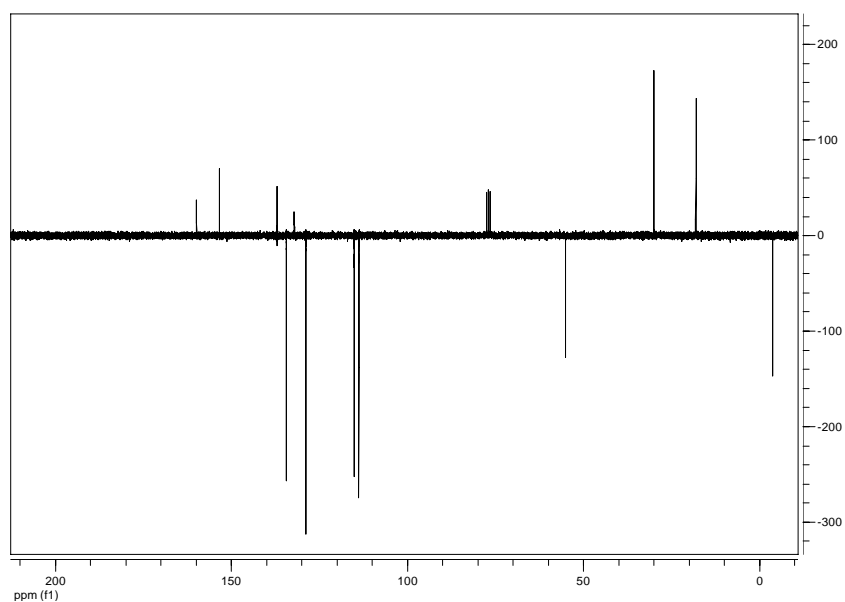

**4-{2-[Diethyl-(4-methoxyphenyl)germanyl]ethyl}phenol 8b.**

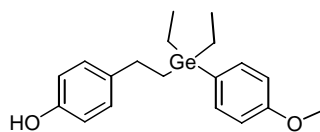

$C_{19}H_{26}GeO_2$   
Mol. Wt.: 359.02

**$^1H$  NMR (250 MHz,  $CDCl_3$ )**

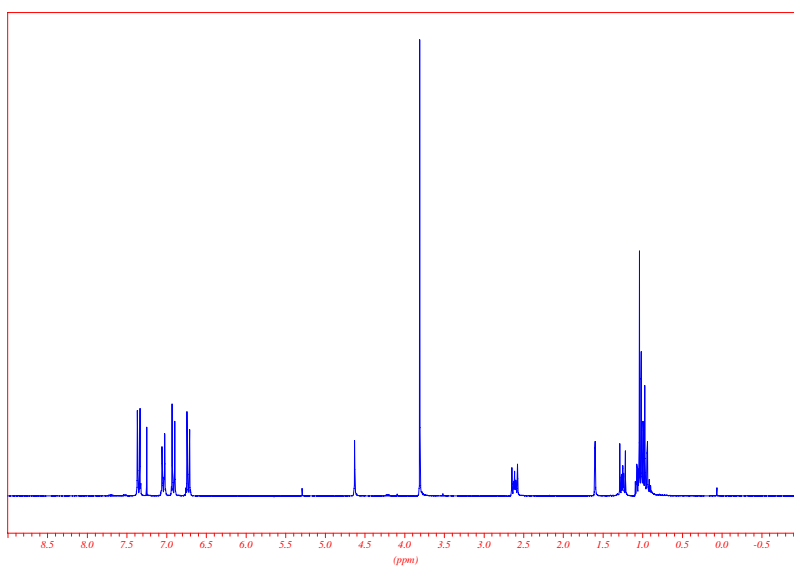

**$^{13}C$  NMR APT (62.8 MHz,  $CDCl_3$ )**

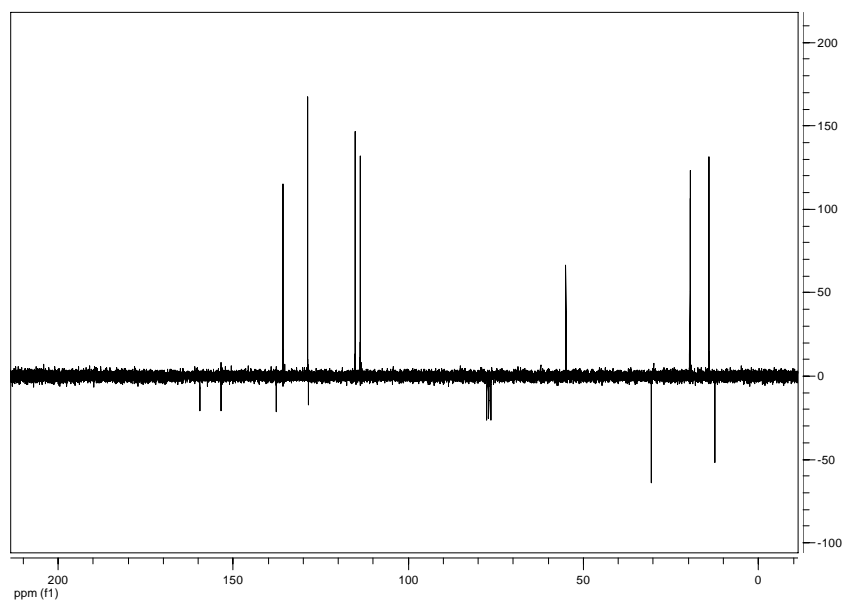

**4-{2-[Diisopropyl-(4-methoxyphenyl)germanyl]ethyl}phenol 8c.**

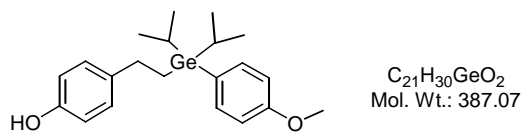

**$^1H$  NMR (250 MHz,  $CDCl_3$ )**

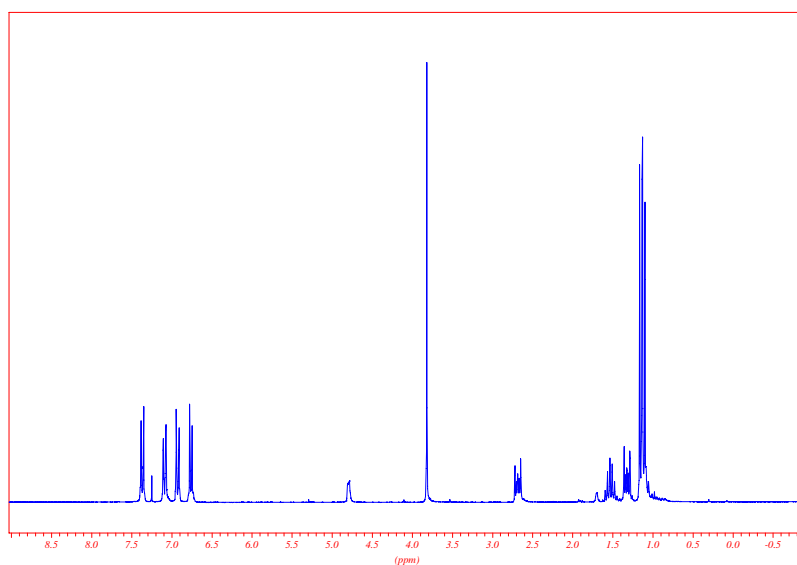

**$^{13}C$  NMR APT (62.8 MHz,  $CDCl_3$ )**

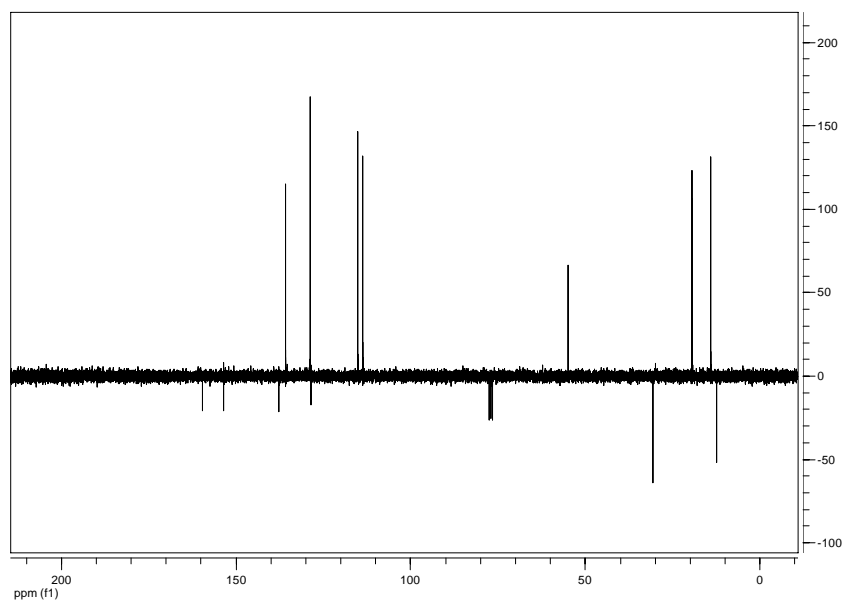

**4-{2-[(4-Methoxyphenyl)diphenylgermanyl]ethyl}phenol 8d.**

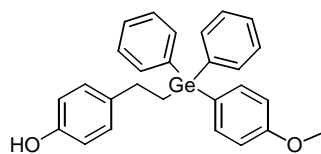

$C_{27}H_{26}GeO_2$   
Mol. Wt.: 455.10

**$^1H$  NMR (250 MHz,  $CDCl_3$ )**

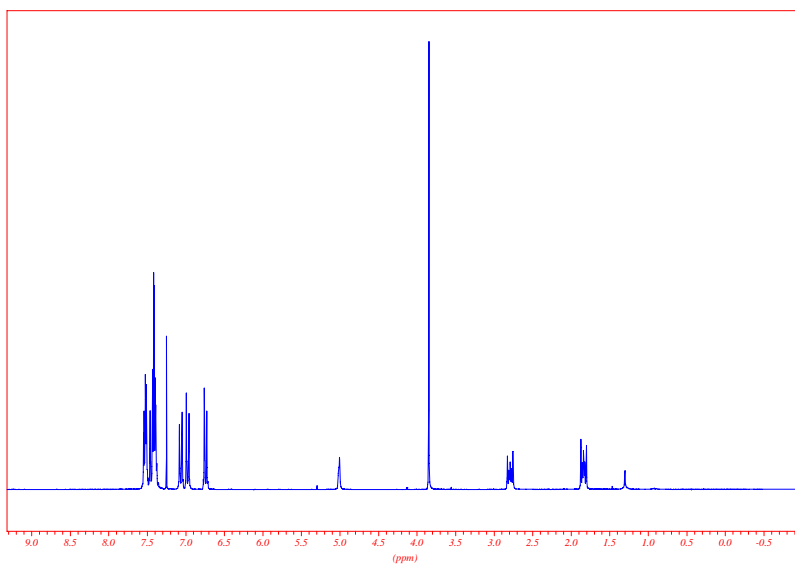

**$^{13}C$  NMR APT (62.8 MHz,  $CDCl_3$ )**

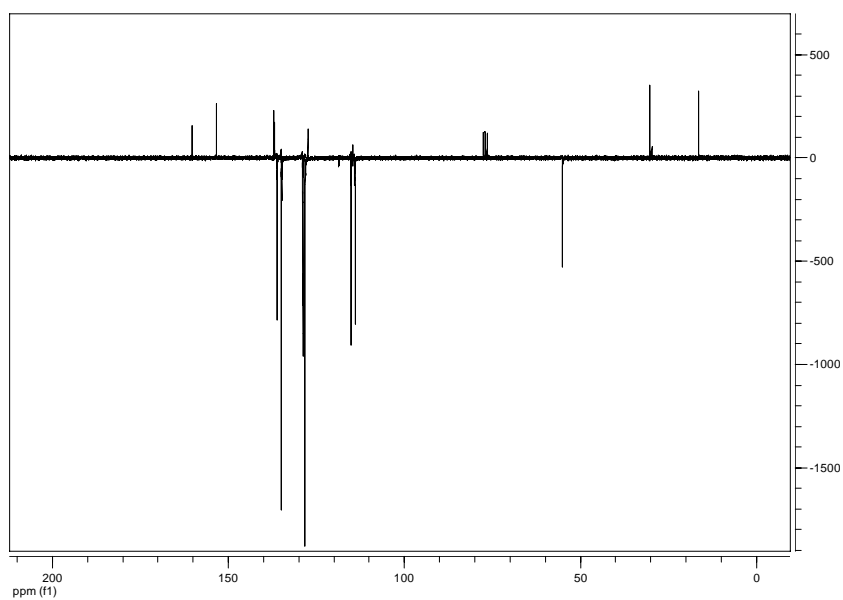



**4-{2-[(4-Methoxyphenyl)-di-*para*-tolylgermanyl]ethyl}phenol 8e.**

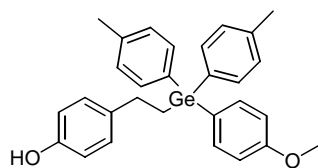

$C_{29}H_{30}GeO_2$   
Mol. Wt.: 483.16

**$^1H$  NMR (250 MHz,  $CDCl_3$ )**

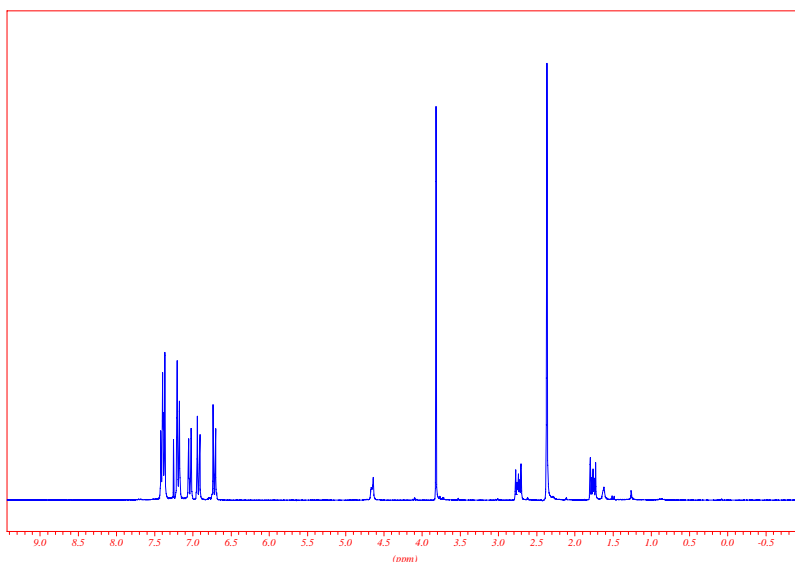

**$^{13}C$  NMR APT (62.8 MHz,  $CDCl_3$ )**

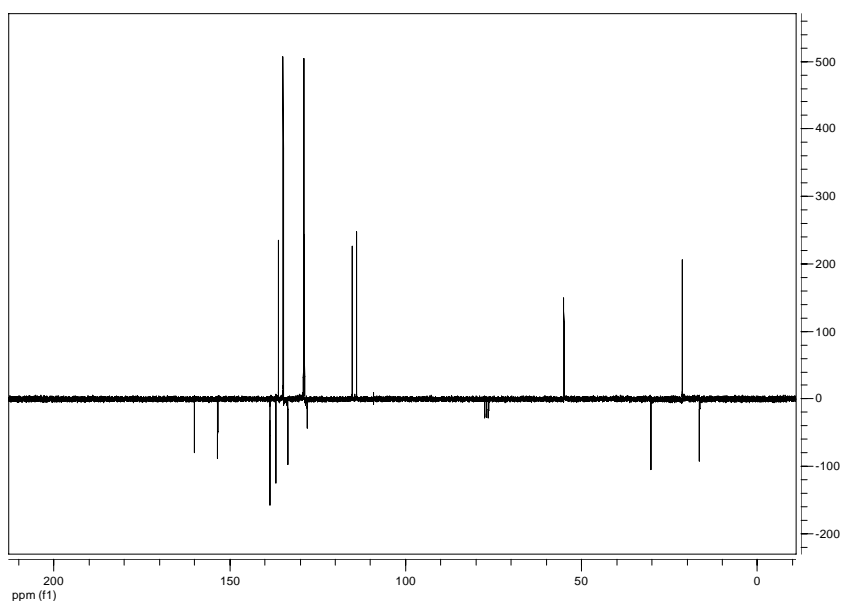

**{2-[4-(2-Ethoxyethoxy)phenyl]ethyl}-(4-methoxyphenyl)dimethylgermane 9a.**

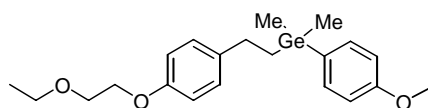

$C_{21}H_{30}GeO_3$   
Mol. Wt.: 403.07

**$^1H$  NMR (250 MHz,  $CDCl_3$ )**

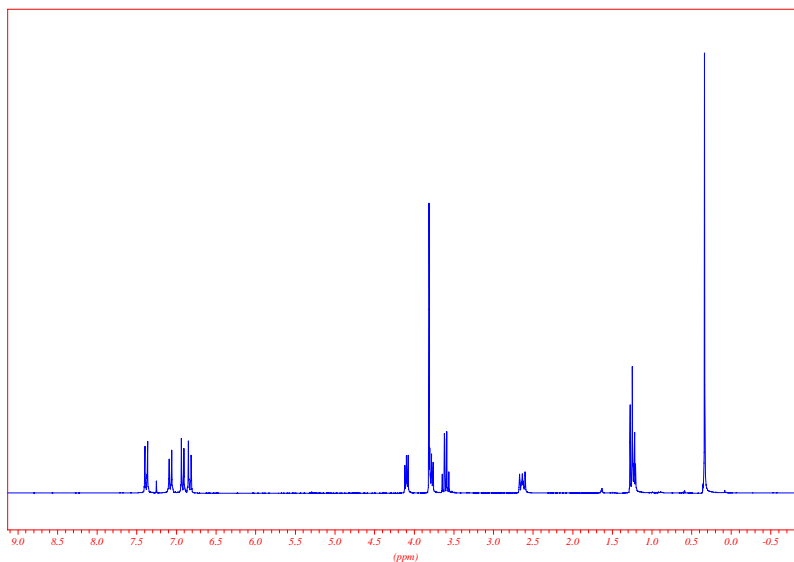

**$^{13}C$  NMR APT (62.8 MHz,  $CDCl_3$ )**

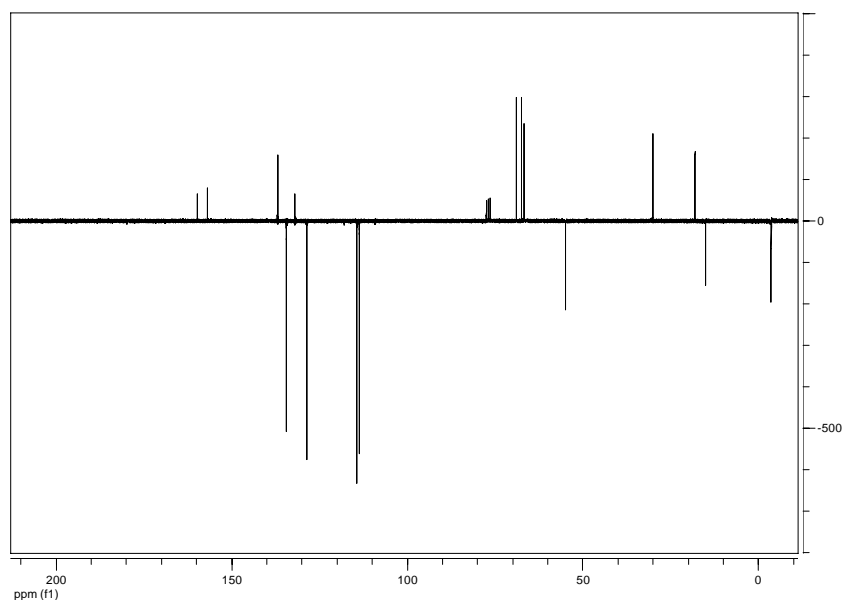

**{2-[4-(2-Ethoxyethoxy)phenyl]ethyl}diethyl-(4-methoxyphenyl)germane 9b.**

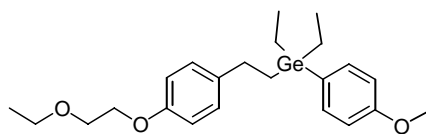

$C_{23}H_{34}GeO_3$   
Mol. Wt.: 431.12

**$^1H$  NMR (250 MHz,  $CDCl_3$ )**

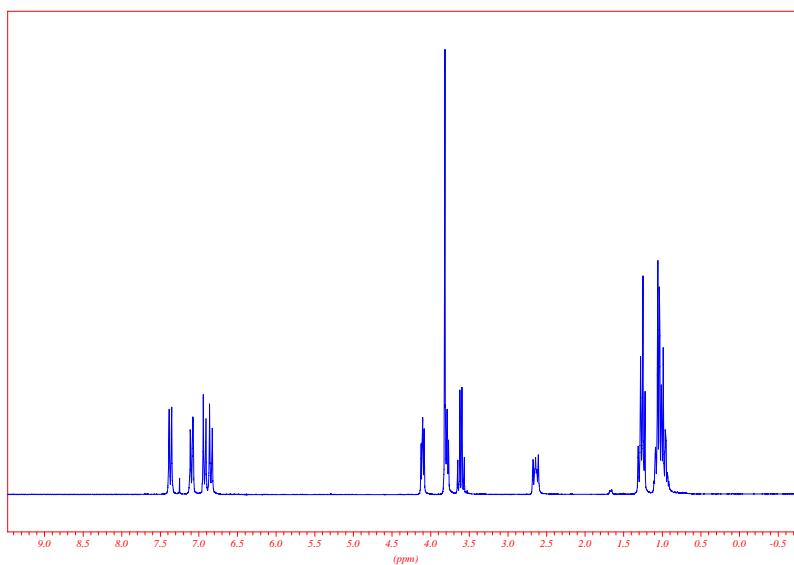

**$^{13}C$  NMR APT (62.8 MHz,  $CDCl_3$ )**

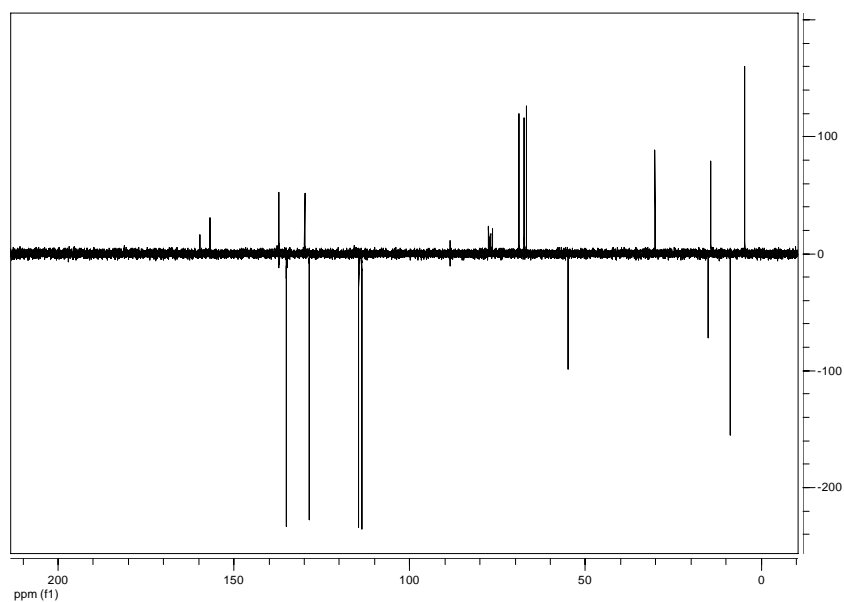

**{2-[4-(2-Ethoxyethoxy)phenyl]ethyl}diisopropyl-(4-methoxyphenyl)germane 9c.**

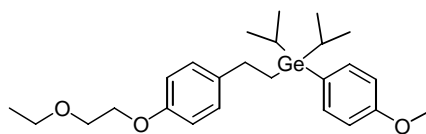

$C_{25}H_{38}GeO_3$   
Mol. Wt.: 459.18

**$^1H$  NMR (250 MHz,  $CDCl_3$ )**

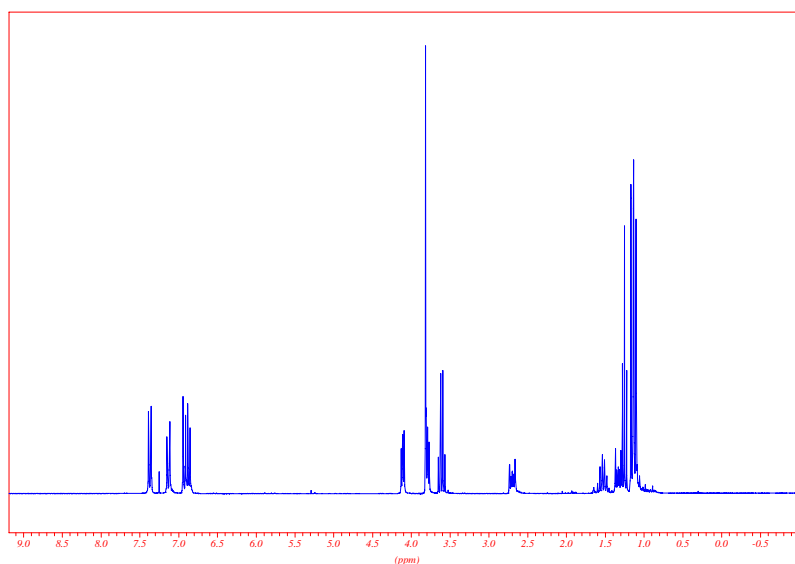

**$^{13}C$  NMR APT (62.8 MHz,  $CDCl_3$ )**

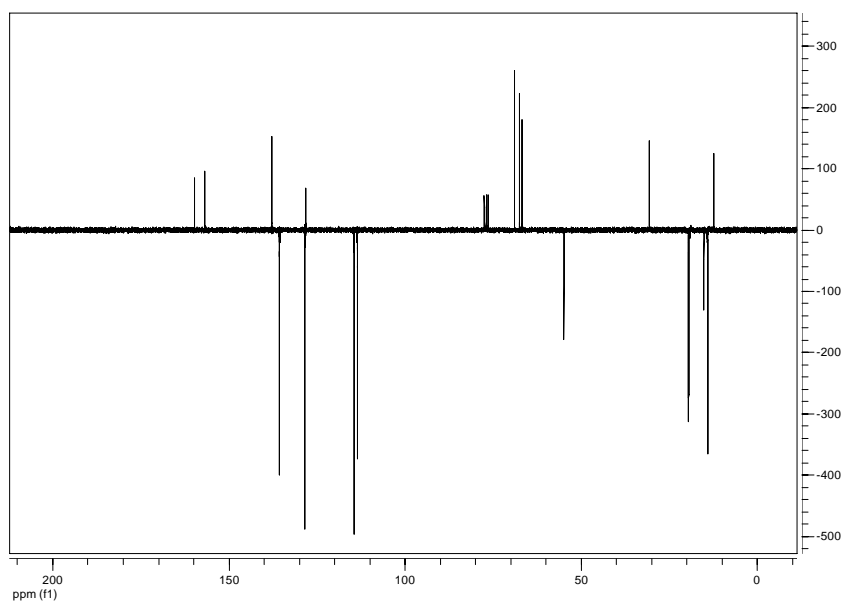

**{2-[4-(2-Ethoxyethoxy)phenyl]ethyl}-(4-methoxyphenyl)diphenylgermane 9d.**

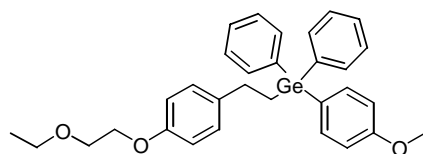

$C_{31}H_{34}GeO_3$   
Mol. Wt.: 527.21

**$^1H$  NMR (250 MHz,  $CDCl_3$ )**

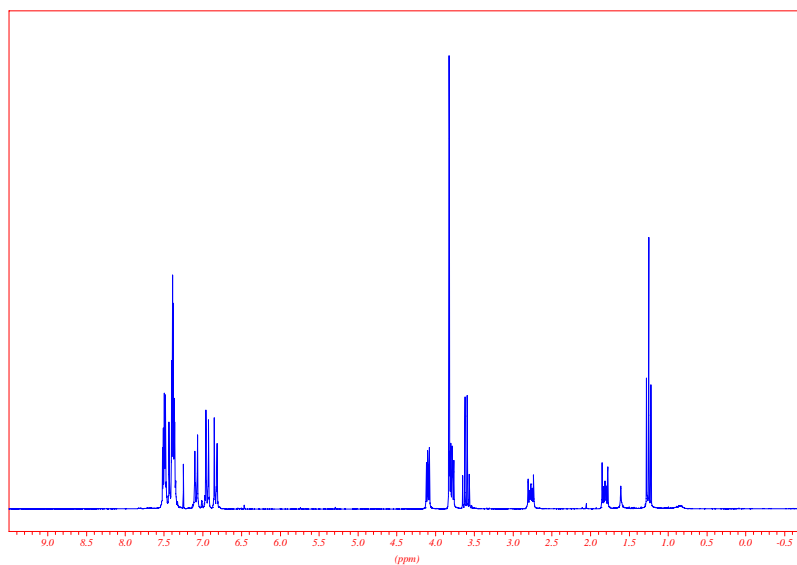

**$^{13}C$  NMR APT (62.8 MHz,  $CDCl_3$ )**

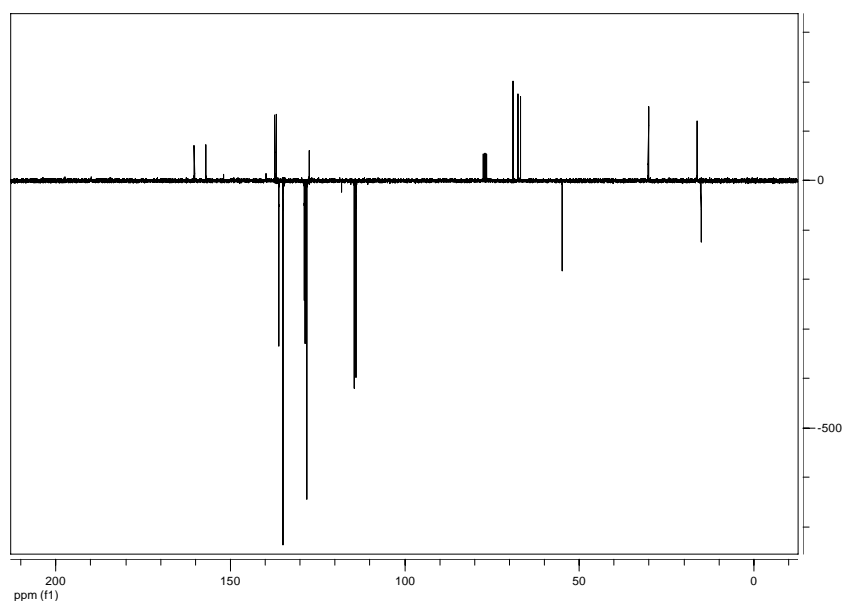

**{2-[4-(2-Ethoxyethoxy)phenyl]ethyl}-(4-methoxyphenyl)di-*para*-tolylgermane 9e.**

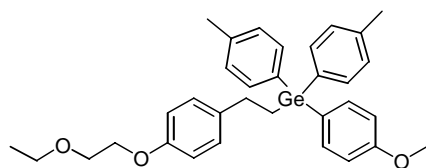

$C_{33}H_{38}GeO_3$   
Mol. Wt.: 555.26

**$^1H$  NMR (250 MHz,  $CDCl_3$ )**

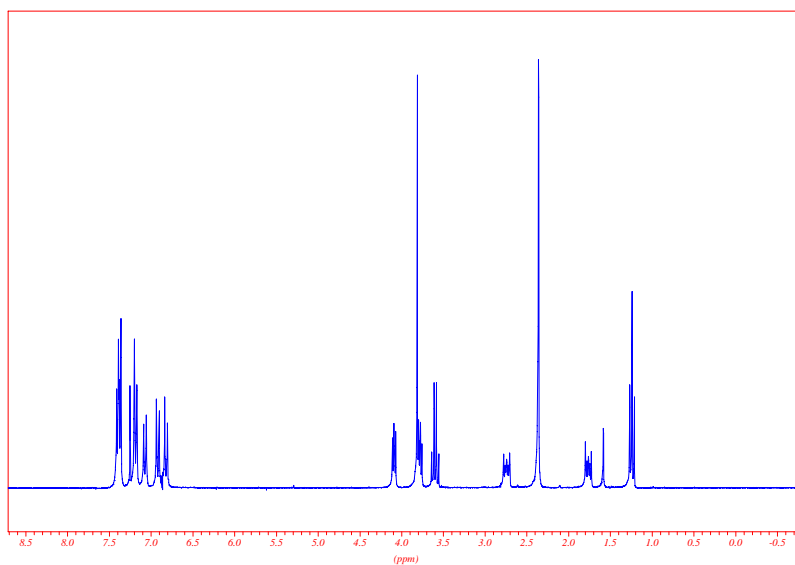

**$^{13}C$  NMR APT (62.8 MHz,  $CDCl_3$ )**

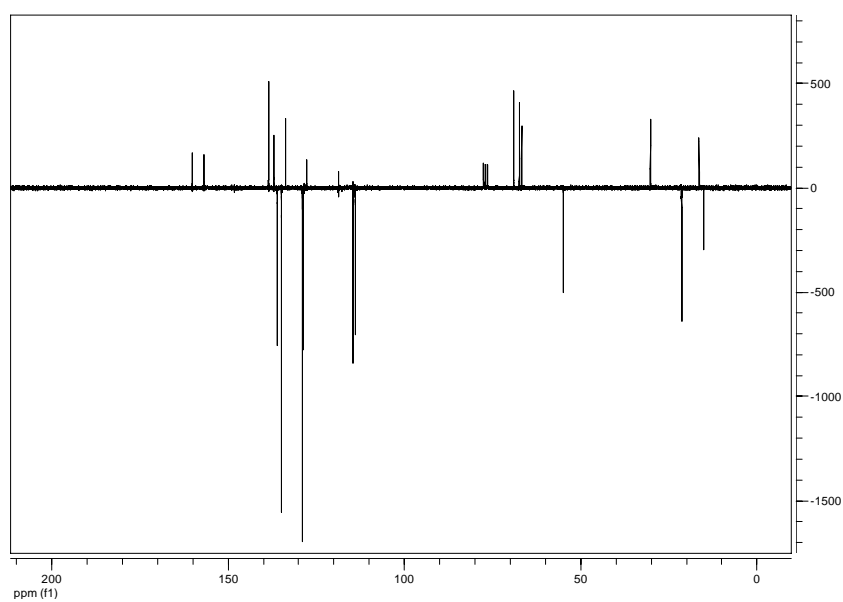

**Bis-(4-{2-[(4-methoxyphenyl)-di-*para*-tolylgermanyl]ethyl}phenoxy)methane.**

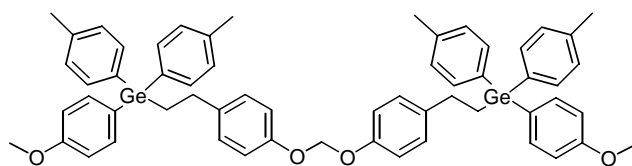

C<sub>59</sub>H<sub>60</sub>Ge<sub>2</sub>O<sub>4</sub>  
Mol. Wt.: 978.33

**<sup>1</sup>H NMR (250 MHz, CDCl<sub>3</sub>)**

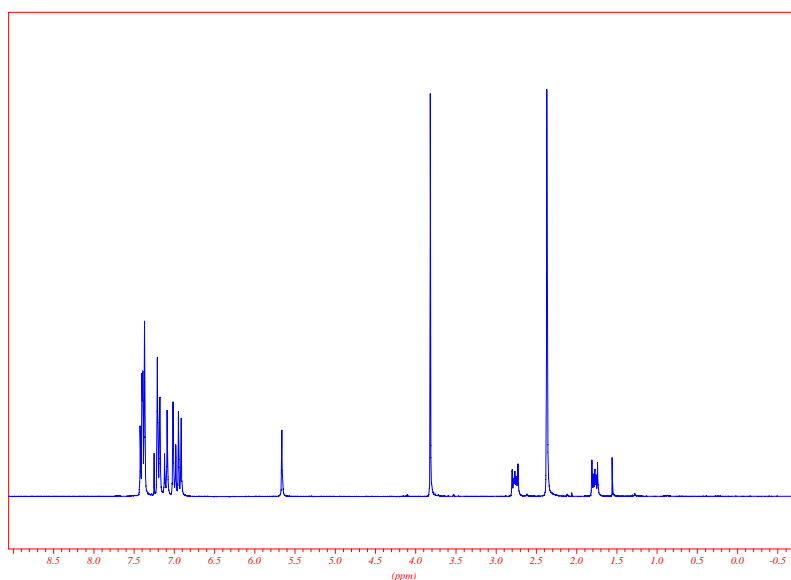

**<sup>13</sup>C NMR APT (62.8 MHz, CDCl<sub>3</sub>)**

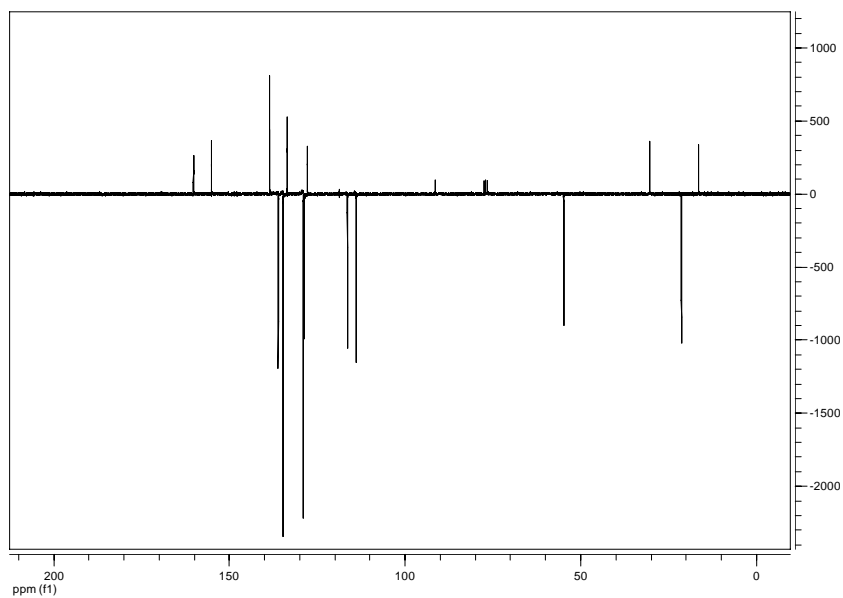

**{2-[4-(2-Ethoxyethoxy)phenyl]ethyl}-(4-hexylthiophen-2-yl)dimethylgermane 10a.**

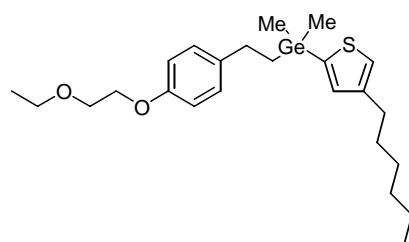

$C_{24}H_{38}GeO_2S$   
Mol. Wt.: 463.23

**$^1H$  NMR (250 MHz,  $CDCl_3$ )**

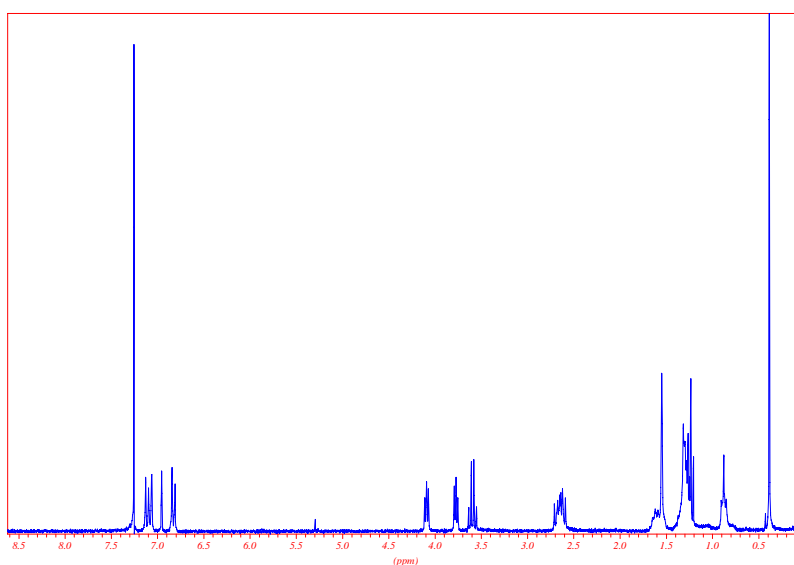

**$^{13}C$  NMR APT (62.8 MHz,  $CDCl_3$ )**

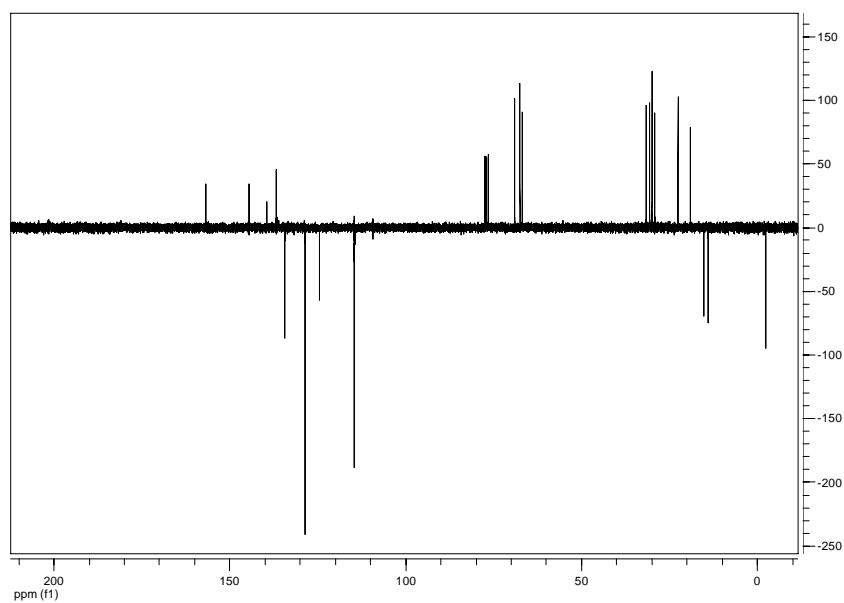



**{2-[4-(2-Ethoxy)phenyl]ethyl}diethyl-(4-hexylthiophen-2-yl)germane 10b.**

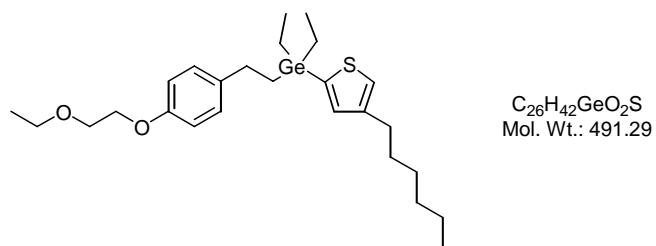

**$^1H$  NMR (250 MHz,  $CDCl_3$ )**

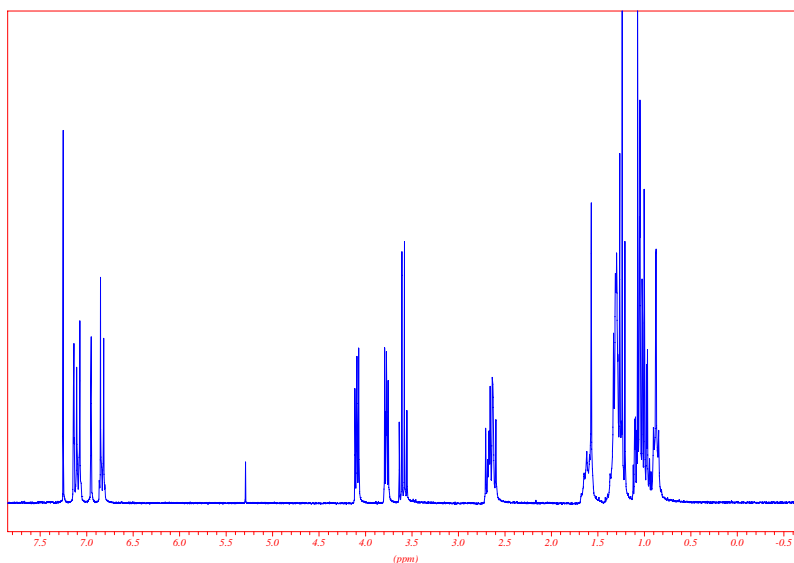

**$^{13}C$  NMR APT (62.8 MHz,  $CDCl_3$ )**

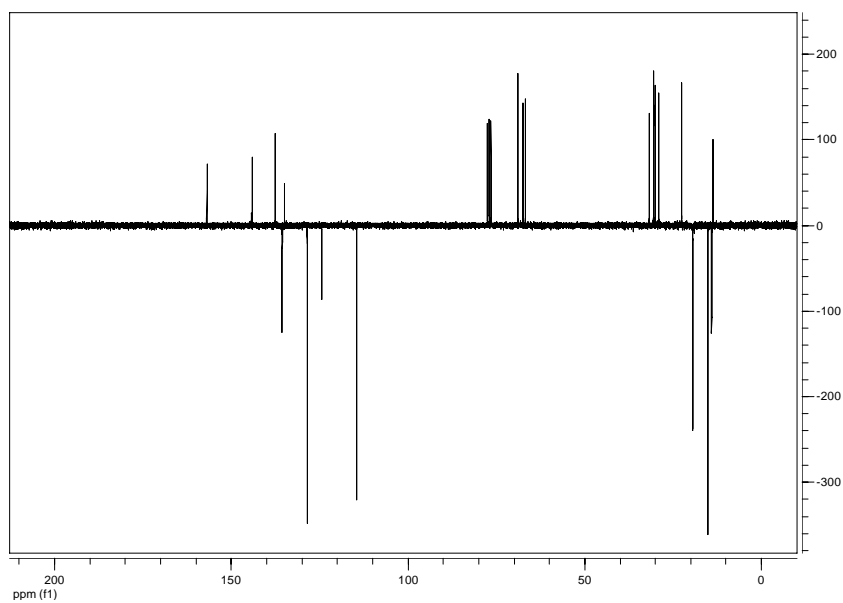

**{2-[4-(2-Ethoxyethoxy)phenyl]ethyl}-(4-hexylthiophen-2-yl)di-*iso*-propylgermane 10c.**

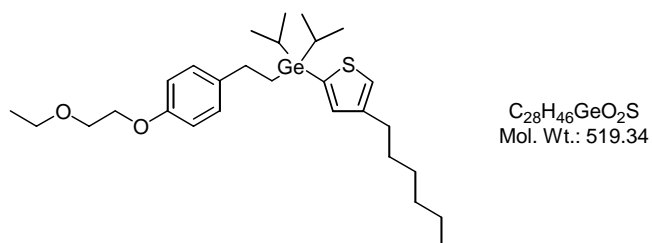

**$^1H$  NMR (250 MHz,  $CDCl_3$ )**

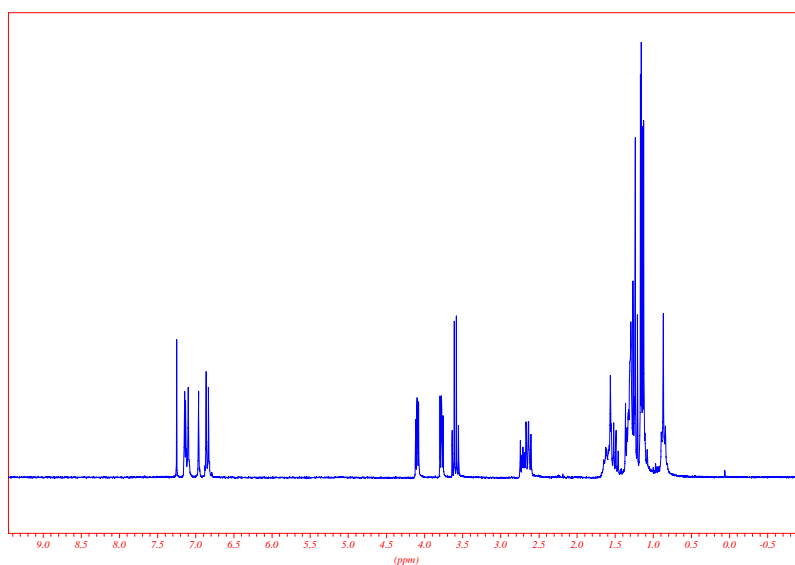

**$^{13}C$  NMR APT (62.8 MHz,  $CDCl_3$ )**

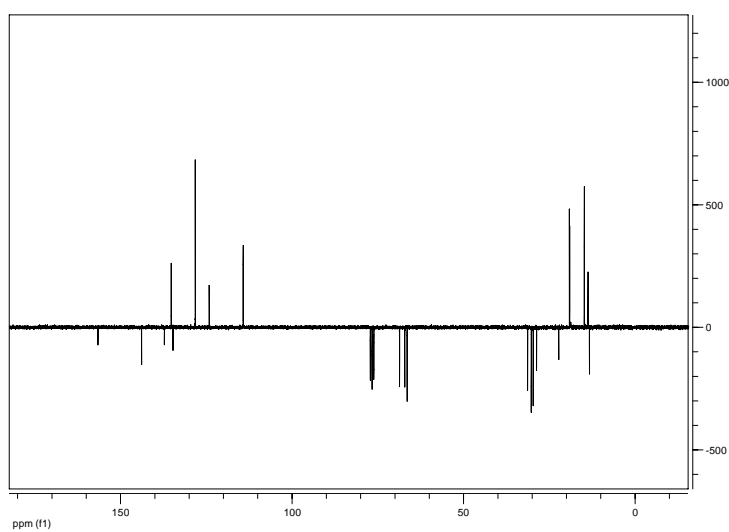

**{2-[4-(2-Ethoxy-ethoxy)-phenyl]-ethyl}-(4-hexyl-thiophen-2-yl)-diphenyl-germane 10d.**

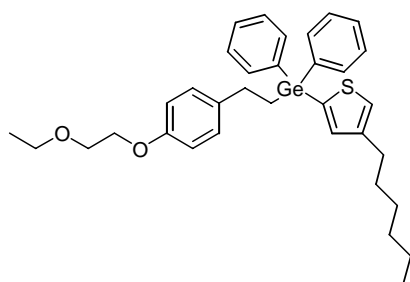

$C_{34}H_{42}GeO_2S$   
Mol. Wt.: 587.37

**$^1H$  NMR (250 MHz,  $CDCl_3$ )**

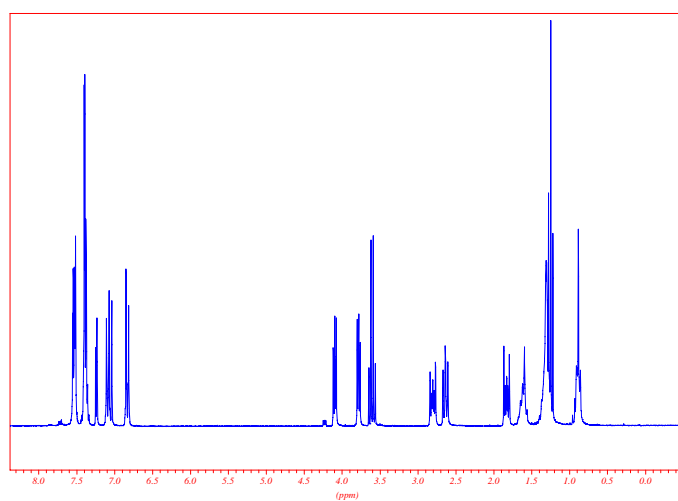

**$^{13}C$  NMR APT (62.8 MHz,  $CDCl_3$ )**

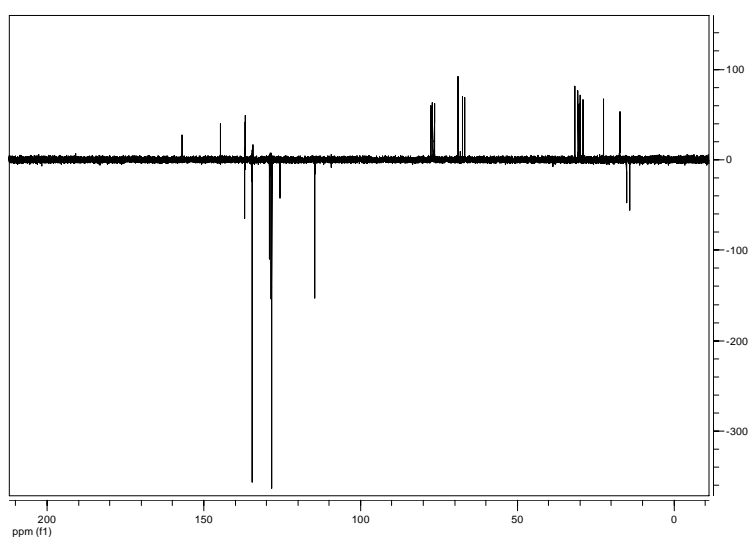

**{2-[4-(2-Ethoxyethoxy)phenyl]ethyl)-(4-hexylthiophen-2-yl)-di-*para*-tolylgermane 10e.**

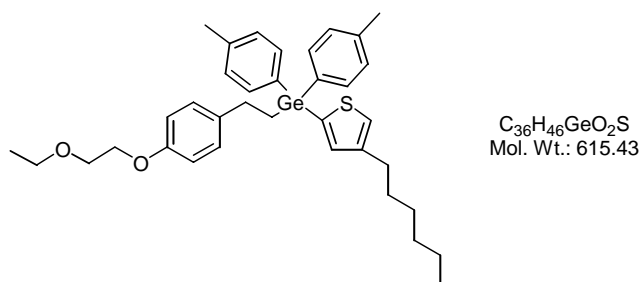

**$^1H$  NMR (250 MHz,  $CDCl_3$ )**

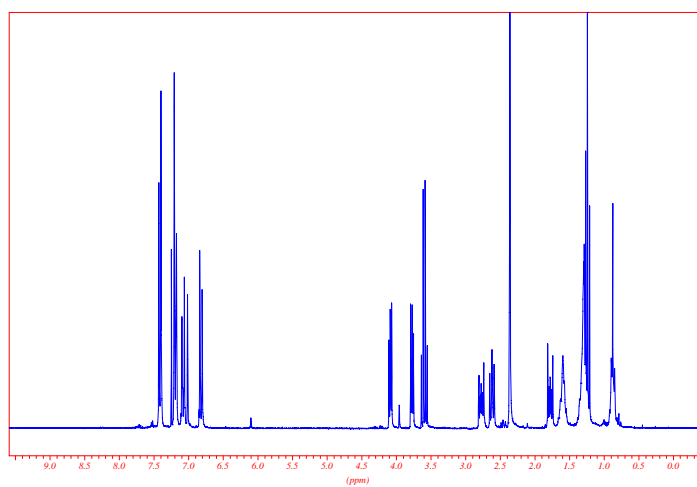

**$^{13}C$  NMR APT (62.8 MHz,  $CDCl_3$ )**

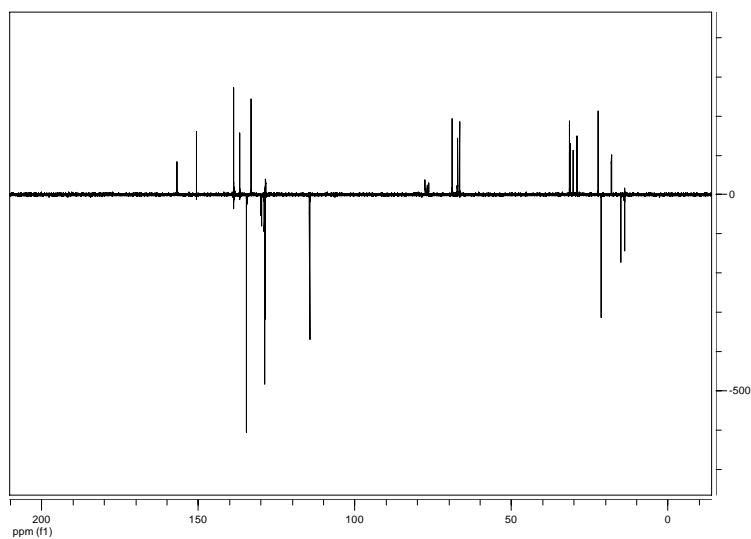

***tert*-Butyl-(4-hexylthiophen-2-yl)dimethylsilane 12.**

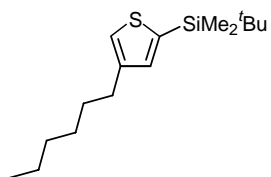

C<sub>16</sub>H<sub>30</sub>SSi  
Mol. Wt.: 282.56

**<sup>1</sup>H NMR (250 MHz, CDCl<sub>3</sub>)**

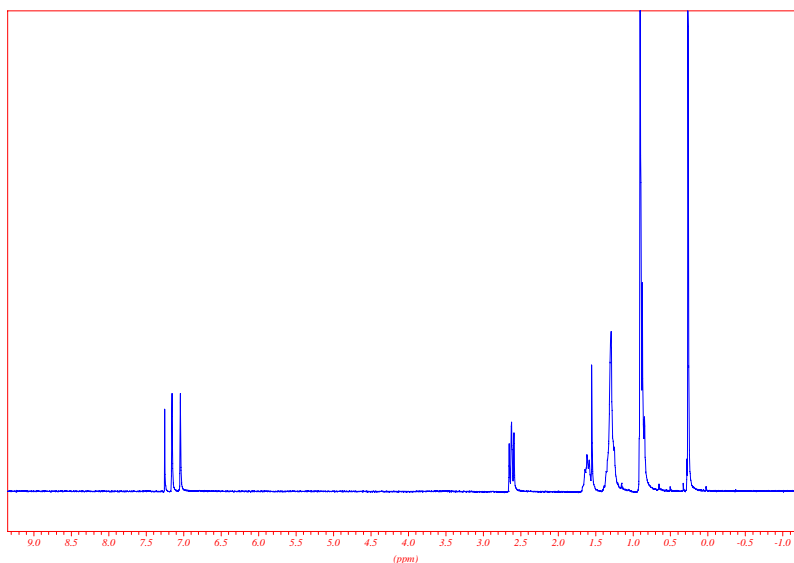

**<sup>13</sup>C NMR APT (62.8 MHz, CDCl<sub>3</sub>)**

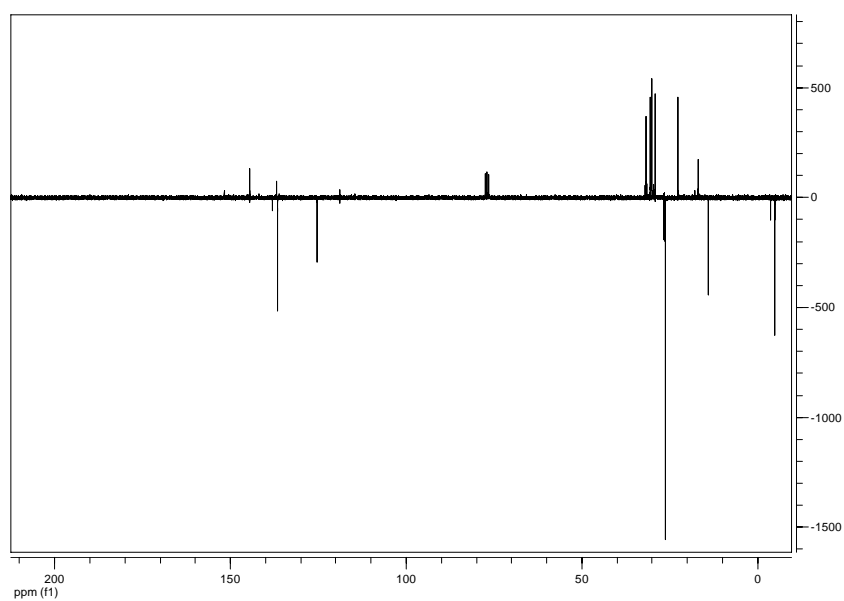

***tert*-Butyl-[5-({2-[4-(2-ethoxyethoxy)phenyl]ethyl}di-*para*-tolylgermany)-4-hexylthiophen-2-yl]dimethylsilane 13.**

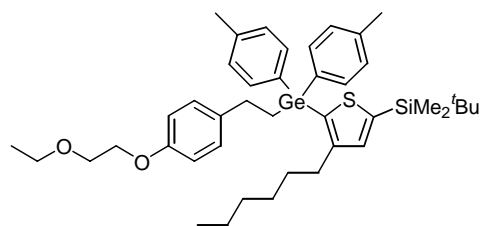

C<sub>42</sub>H<sub>60</sub>GeO<sub>2</sub>SSi  
Mol. Wt.: 729.69

**<sup>1</sup>H NMR (250 MHz, CDCl<sub>3</sub>)**

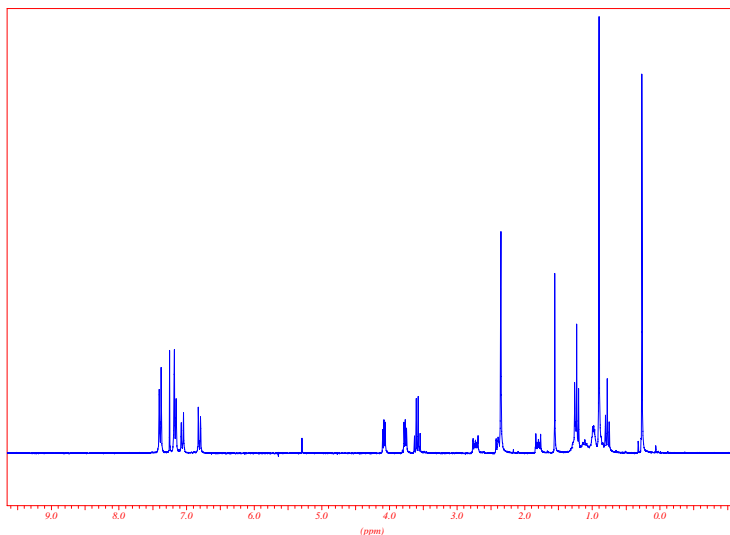

**<sup>13</sup>C NMR APT (62.8 MHz, CDCl<sub>3</sub>)**

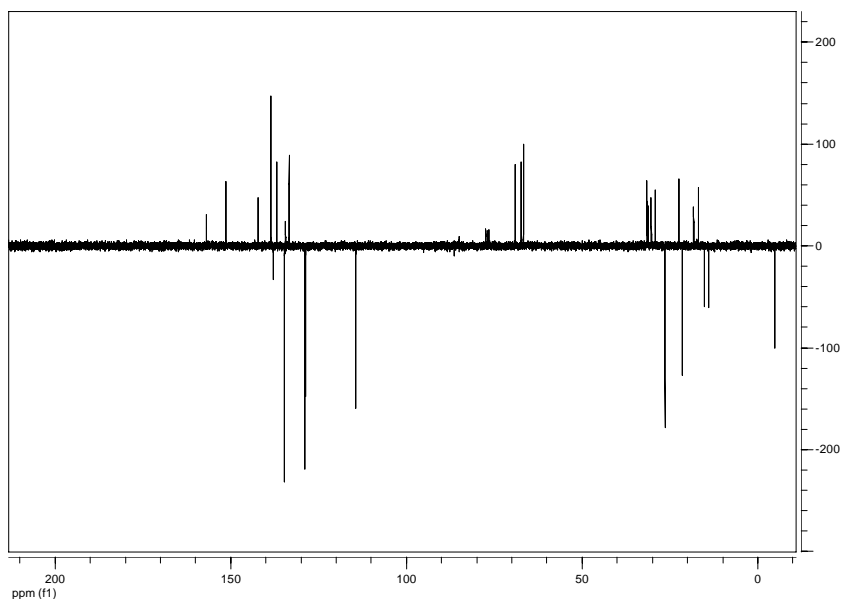

**{2-[4-(2-Ethoxyethoxy)phenyl]ethyl}-(3-*n*-hexylthiophen-2-yl)di-*para*-tolylgermane 14.**

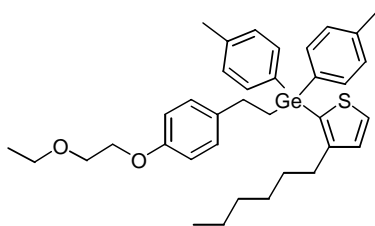

$C_{36}H_{46}GeO_2S$   
Mol. Wt.: 615.43

**$^1H$  NMR (250 MHz,  $CDCl_3$ )**

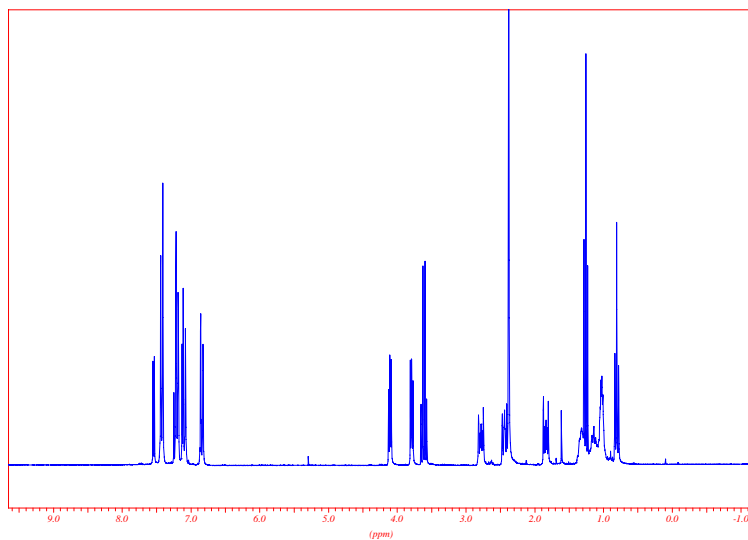

**$^{13}C$  NMR APT (62.8 MHz,  $CDCl_3$ )**

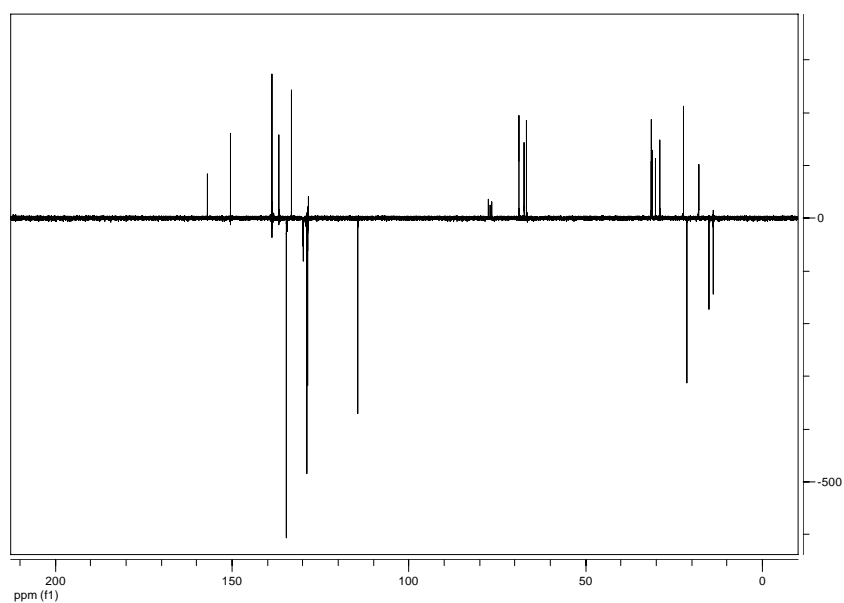

**{2-[4-(2-Ethoxyethoxy)phenyl]ethyl}-(3-*n*-hexyl-5-iodothiophen-2-yl)-di-*para*-tolylgermane 15.**

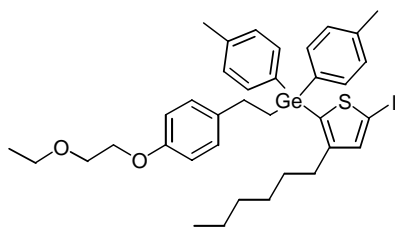

C<sub>36</sub>H<sub>45</sub>GeIO<sub>2</sub>S  
Mol. Wt.: 741.32

**<sup>1</sup>H NMR (250 MHz, CDCl<sub>3</sub>)**

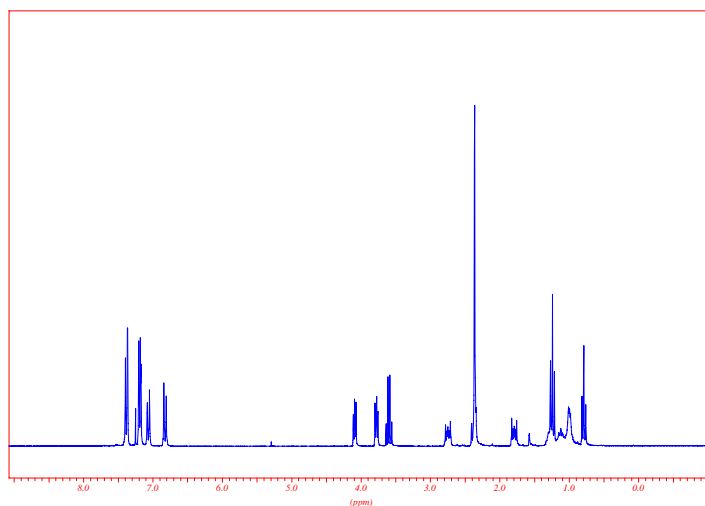

**<sup>13</sup>C NMR APT (62.8 MHz, CDCl<sub>3</sub>)**

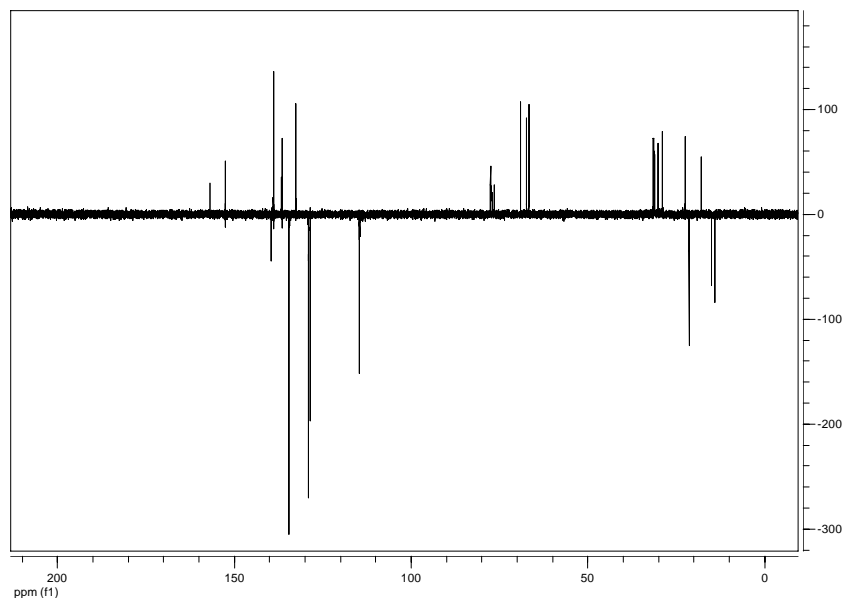



**2-[5-(*tert*-Butyldimethylsilanyl)-3-*n*-hexylthiophen-2-yl]-4,4,5,5-tetramethyl-[1,2,3]dioxaboralane 16.**

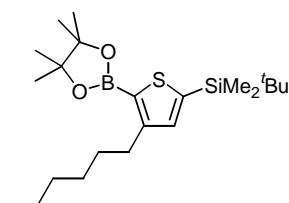

C<sub>22</sub>H<sub>41</sub>BO<sub>2</sub>SSi  
Mol. Wt.: 408.52

**<sup>1</sup>H NMR (250 MHz, CDCl<sub>3</sub>)**

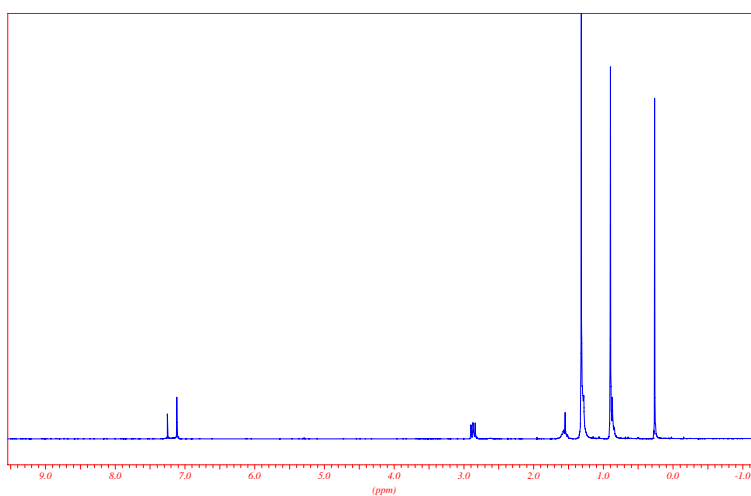

**<sup>13</sup>C NMR APT (62.8 MHz, CDCl<sub>3</sub>)**

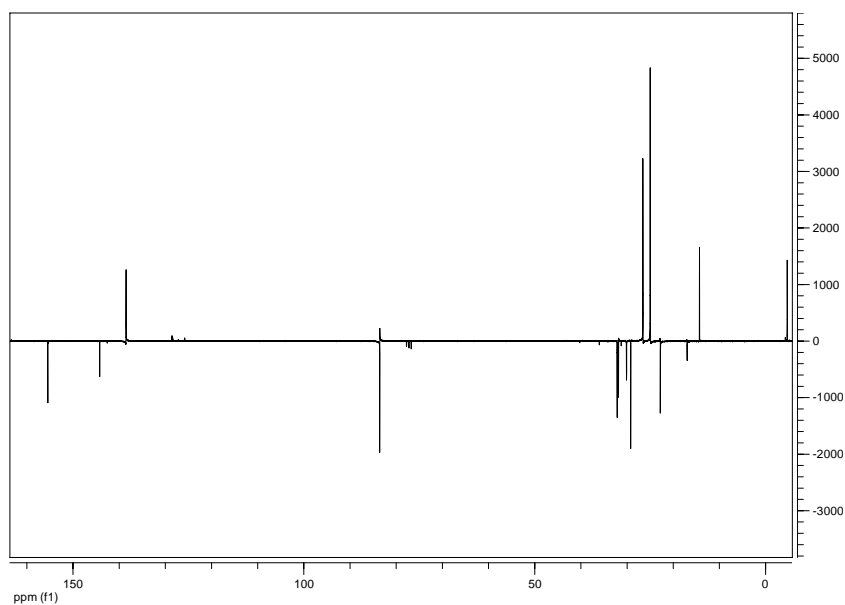

***tert*-Butyl-[5'-({2-[4-(2-ethoxyethoxy)phenyl]ethyl}-di-*para*-tolylgermany)-3,4'-dihexithiophenyl-5-yl]dimethylsilane 17.**

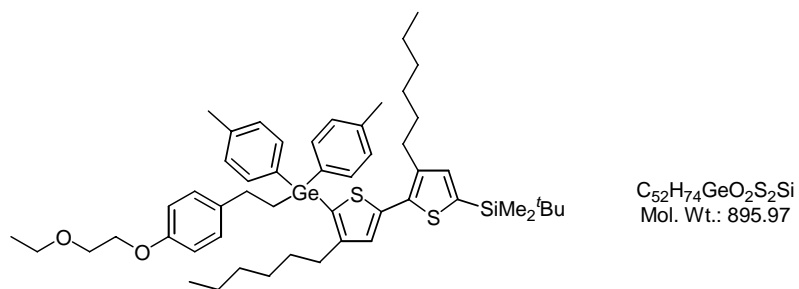

**<sup>1</sup>H NMR (250 MHz, CDCl<sub>3</sub>)**

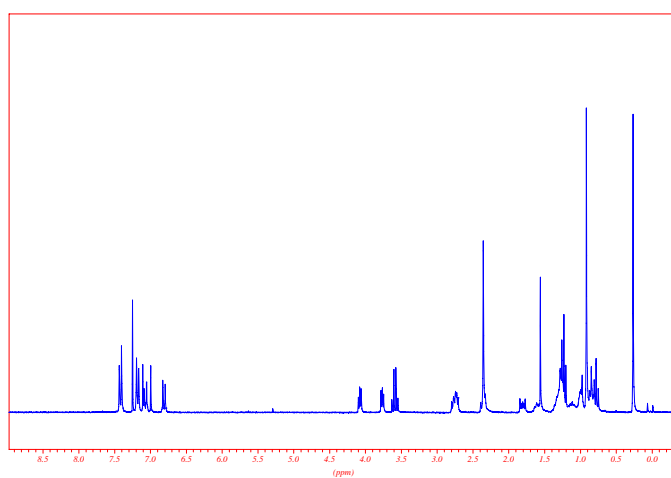

**<sup>13</sup>C NMR APT (62.8 MHz, CDCl<sub>3</sub>)**

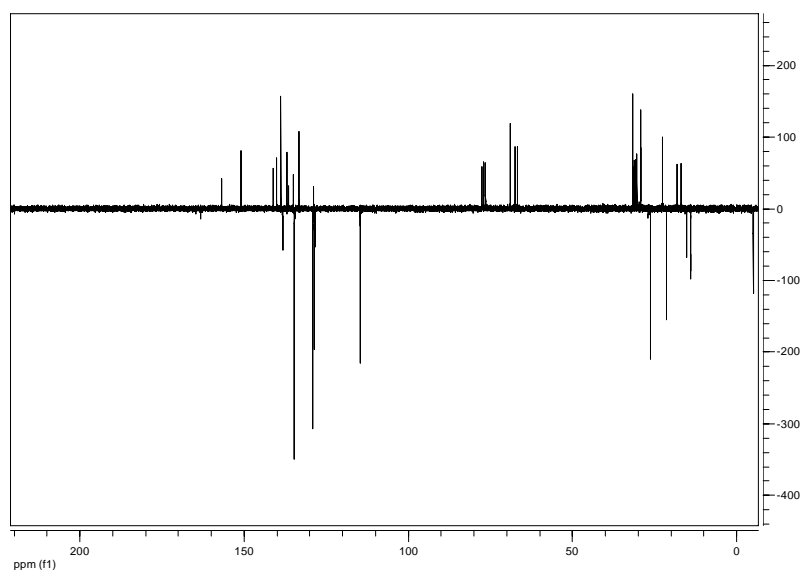

**(4,3'-Dihexyl[2,2']bithiophenyl-5-yl)-{2-[4-(2-ethoxyethoxy)phenyl]ethyl}-di-*para*-tolylgermane**  
**18.**

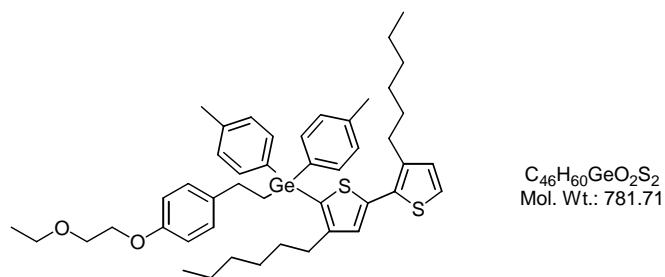

**$^1H$  NMR (250 MHz,  $CDCl_3$ )**

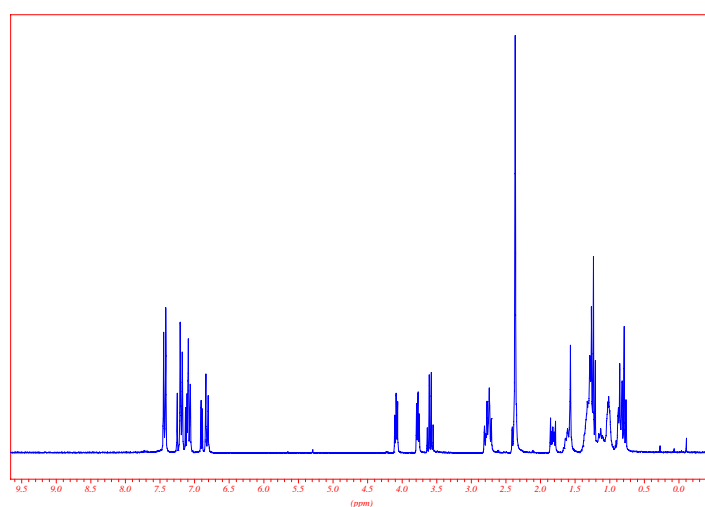

**$^{13}C$  NMR APT (62.8 MHz,  $CDCl_3$ )**

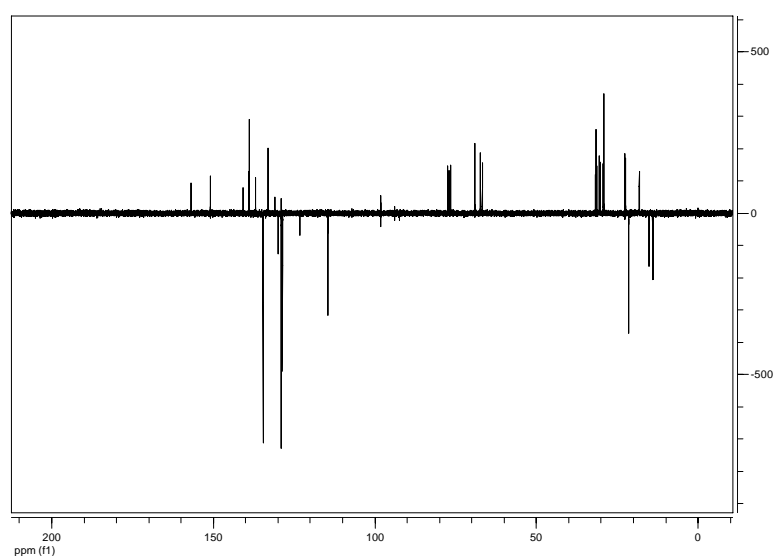

### 3,4'-Dihexyl-[2,2']bithiophene 19.

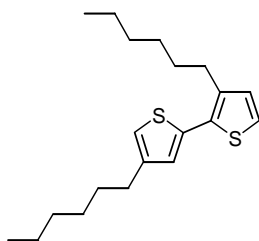

$C_{20}H_{30}S_2$   
Mol. Wt.: 334.58

**HPLC:** Jupiter ODS-C18 column (250 × 0.46 cm), UV 254 nm detection, 1 mLmin<sup>-1</sup>, 5→100% MeCN in H<sub>2</sub>O + 0.1% formic acid, R<sub>f</sub> = 17.1 min.

**Before 'double coupling':**

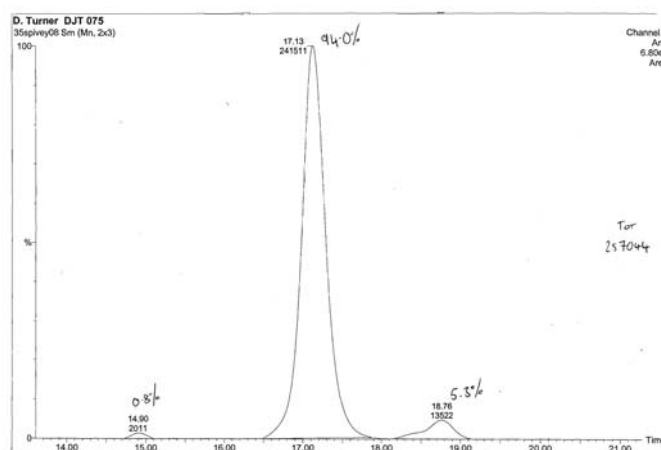

**After 'double coupling':**

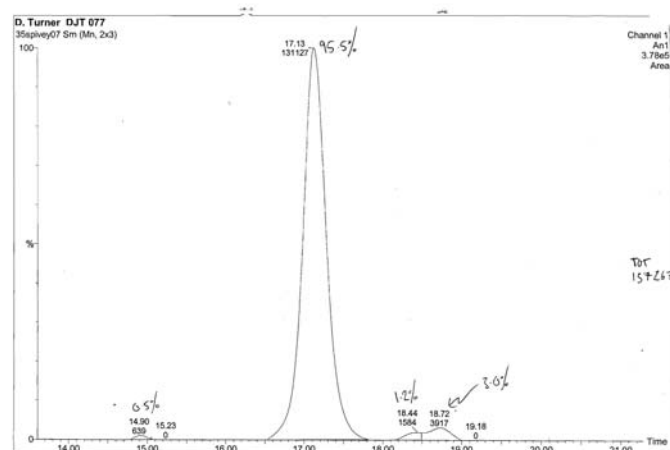

**2-(3-*n*-Hexylthiophen-2-yl)-4,4,5,5-tetramethyl-[1,3,2]dioxaborolane 20.**

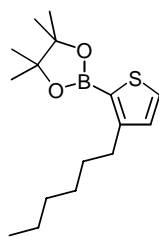

C<sub>16</sub>H<sub>27</sub>BO<sub>2</sub>S  
Mol. Wt.: 294.26

**<sup>1</sup>H NMR (250 MHz, CDCl<sub>3</sub>)**

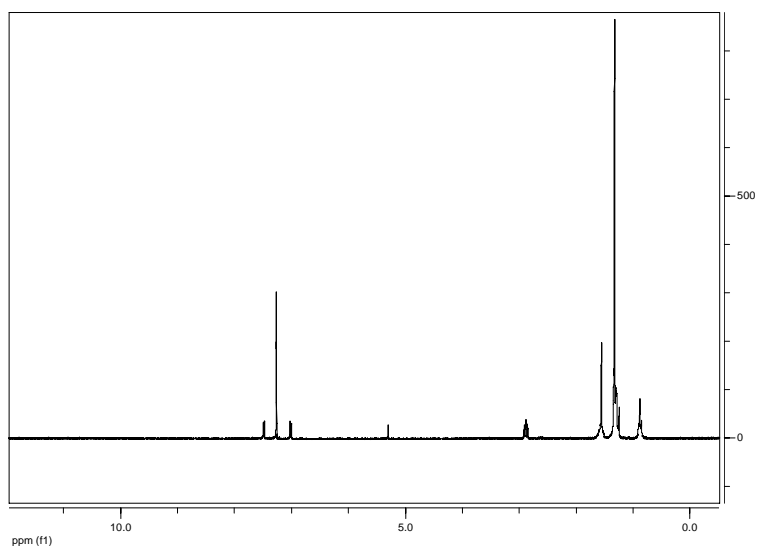

**<sup>13</sup>C NMR APT (62.8 MHz, CDCl<sub>3</sub>)**

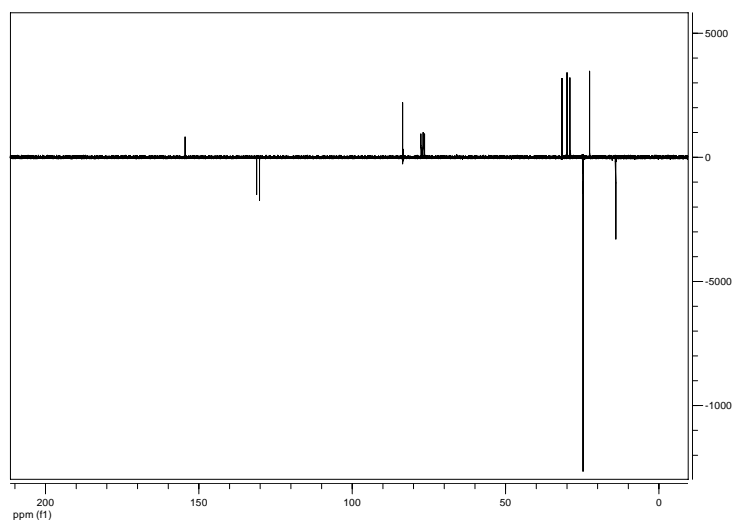

2-[2-(2-*para*-Tolyloxyethoxy)ethoxy]ethanol 23.

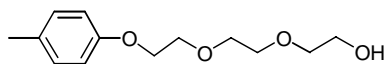

C<sub>13</sub>H<sub>20</sub>O<sub>4</sub>  
Mol. Wt.: 240.30

<sup>1</sup>H NMR (250 MHz, CDCl<sub>3</sub>)

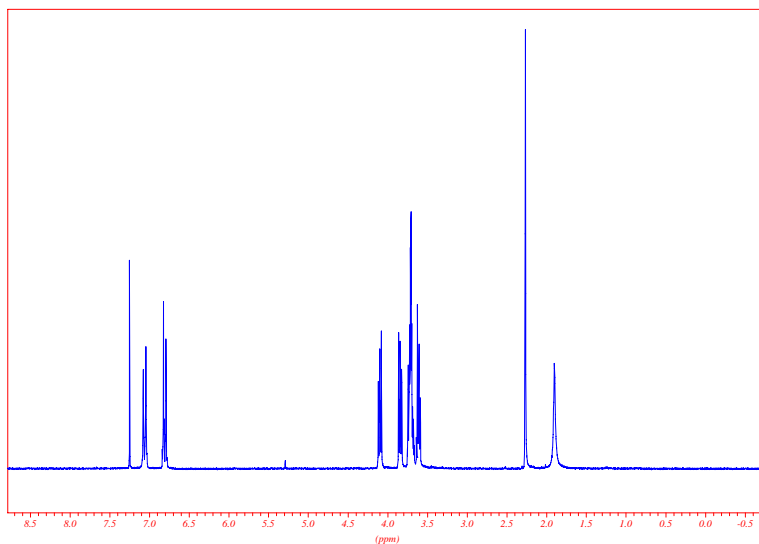

<sup>13</sup>C NMR APT (62.8 MHz, CDCl<sub>3</sub>)

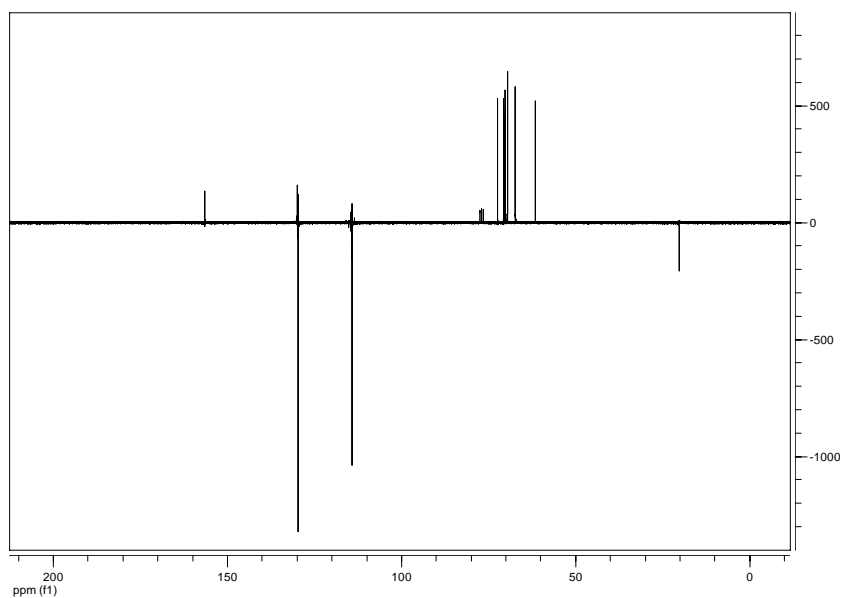

# 1-{2-[2-(2-Chloroethoxy)ethoxy]ethoxy}-4-methylbenzene 24

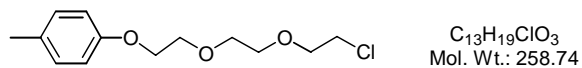

## $^1H$ NMR (250 MHz, $CDCl_3$ )

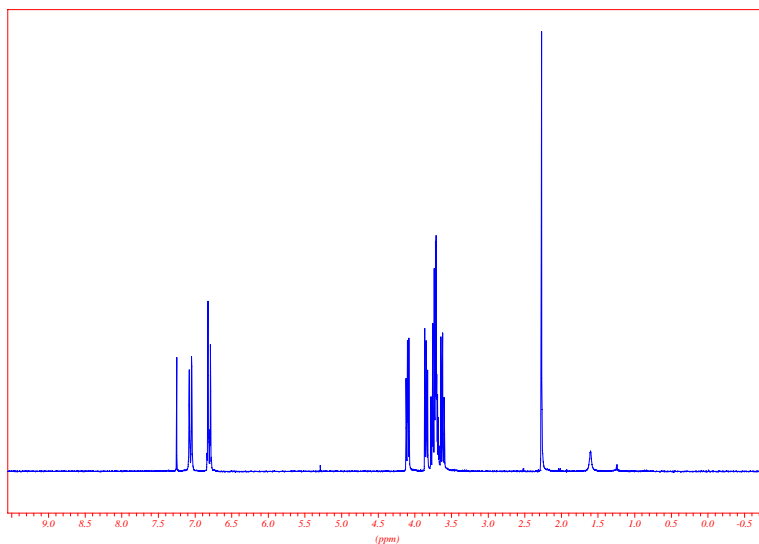

## $^{13}C$ NMR APT (62.8 MHz, $CDCl_3$ )

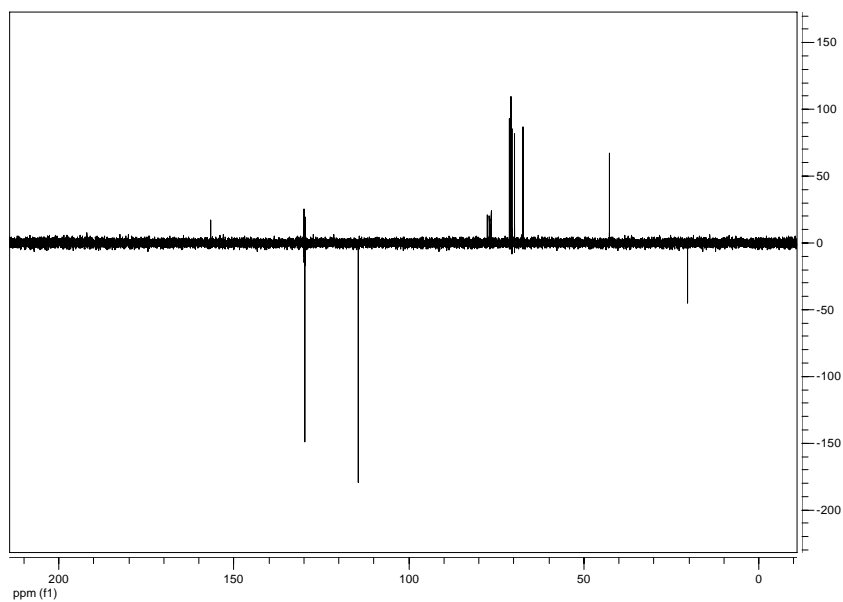

**Formic acid 2-[2-(2-*para*-toloxyethoxy)ethoxy]ethyl ester 25.**

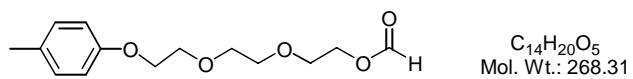

**$^1H$  NMR (250 MHz,  $CDCl_3$ )**

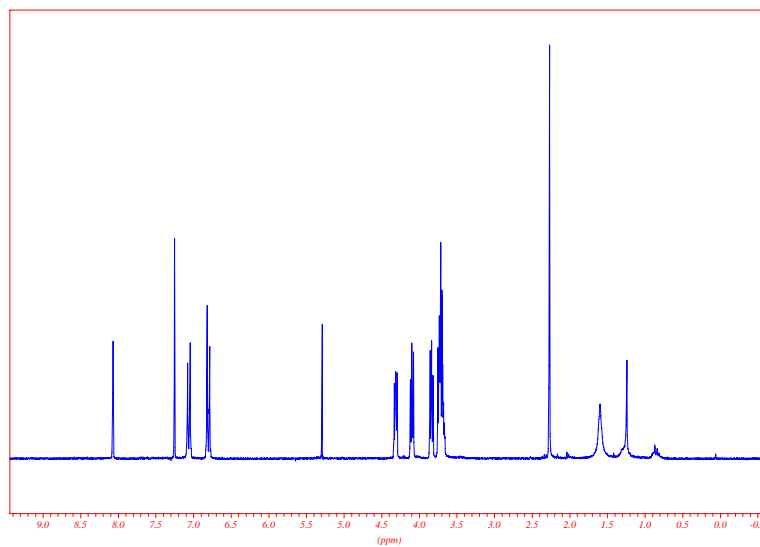



**1-{2-[2-(2-Bromoethoxy)ethoxy]ethoxy}-4-methylbenzene 26.**

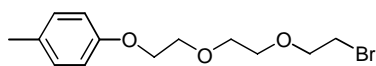

C<sub>13</sub>H<sub>19</sub>BrO<sub>3</sub>  
Mol. Wt.: 303.19

**<sup>1</sup>H NMR (250 MHz, CDCl<sub>3</sub>)**

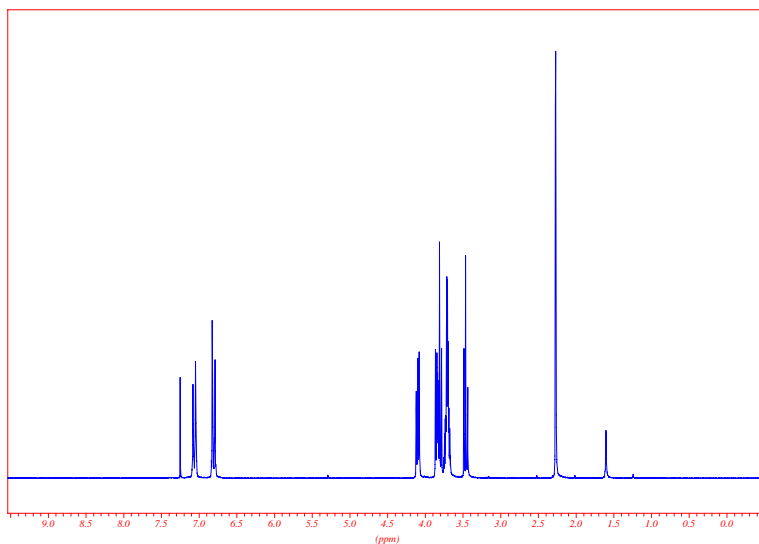

**<sup>13</sup>C NMR APT (62.8 MHz, CDCl<sub>3</sub>)**

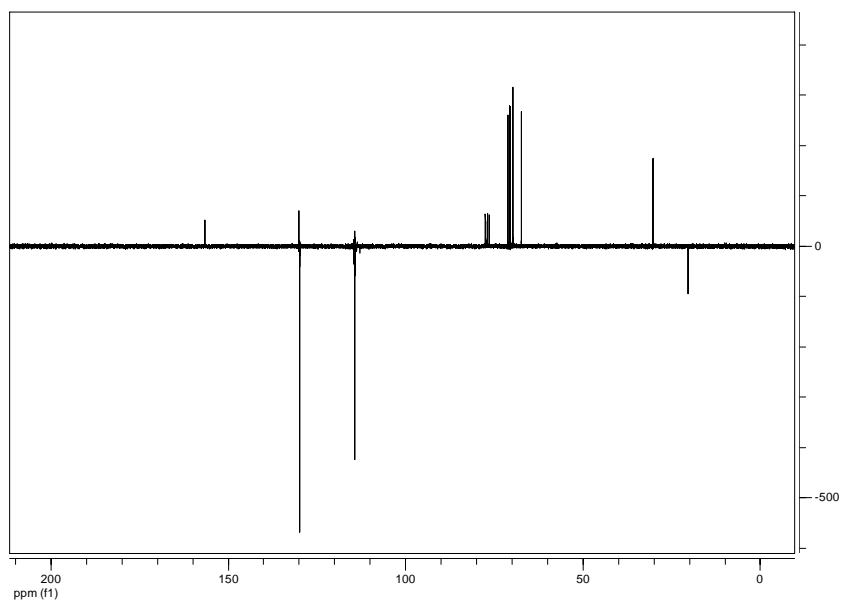

**Trimethyl-[2-(4-{2-[2-(2-*para*-toloxyethoxy)ethoxy]ethoxy}phenyl)ethyl]germane 28.**

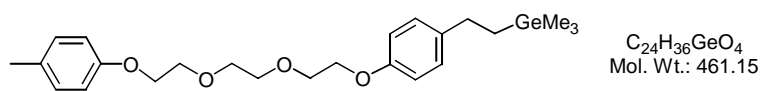

**$^1H$  NMR (250 MHz,  $CDCl_3$ )**

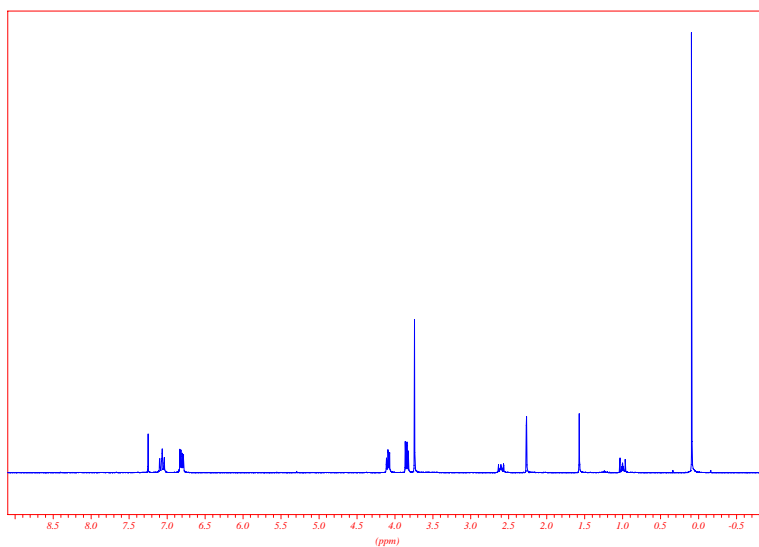

**$^{13}C$  NMR APT (62.8 MHz,  $CDCl_3$ )**

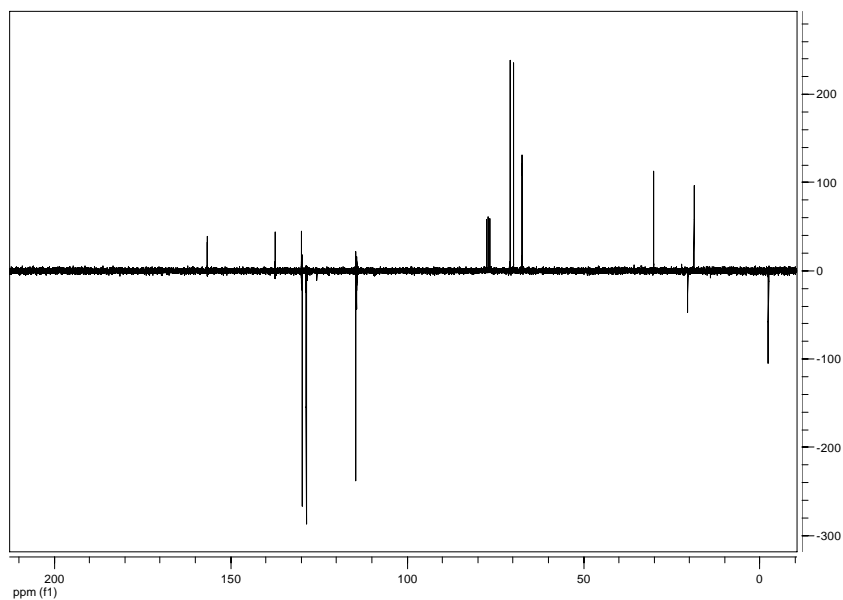

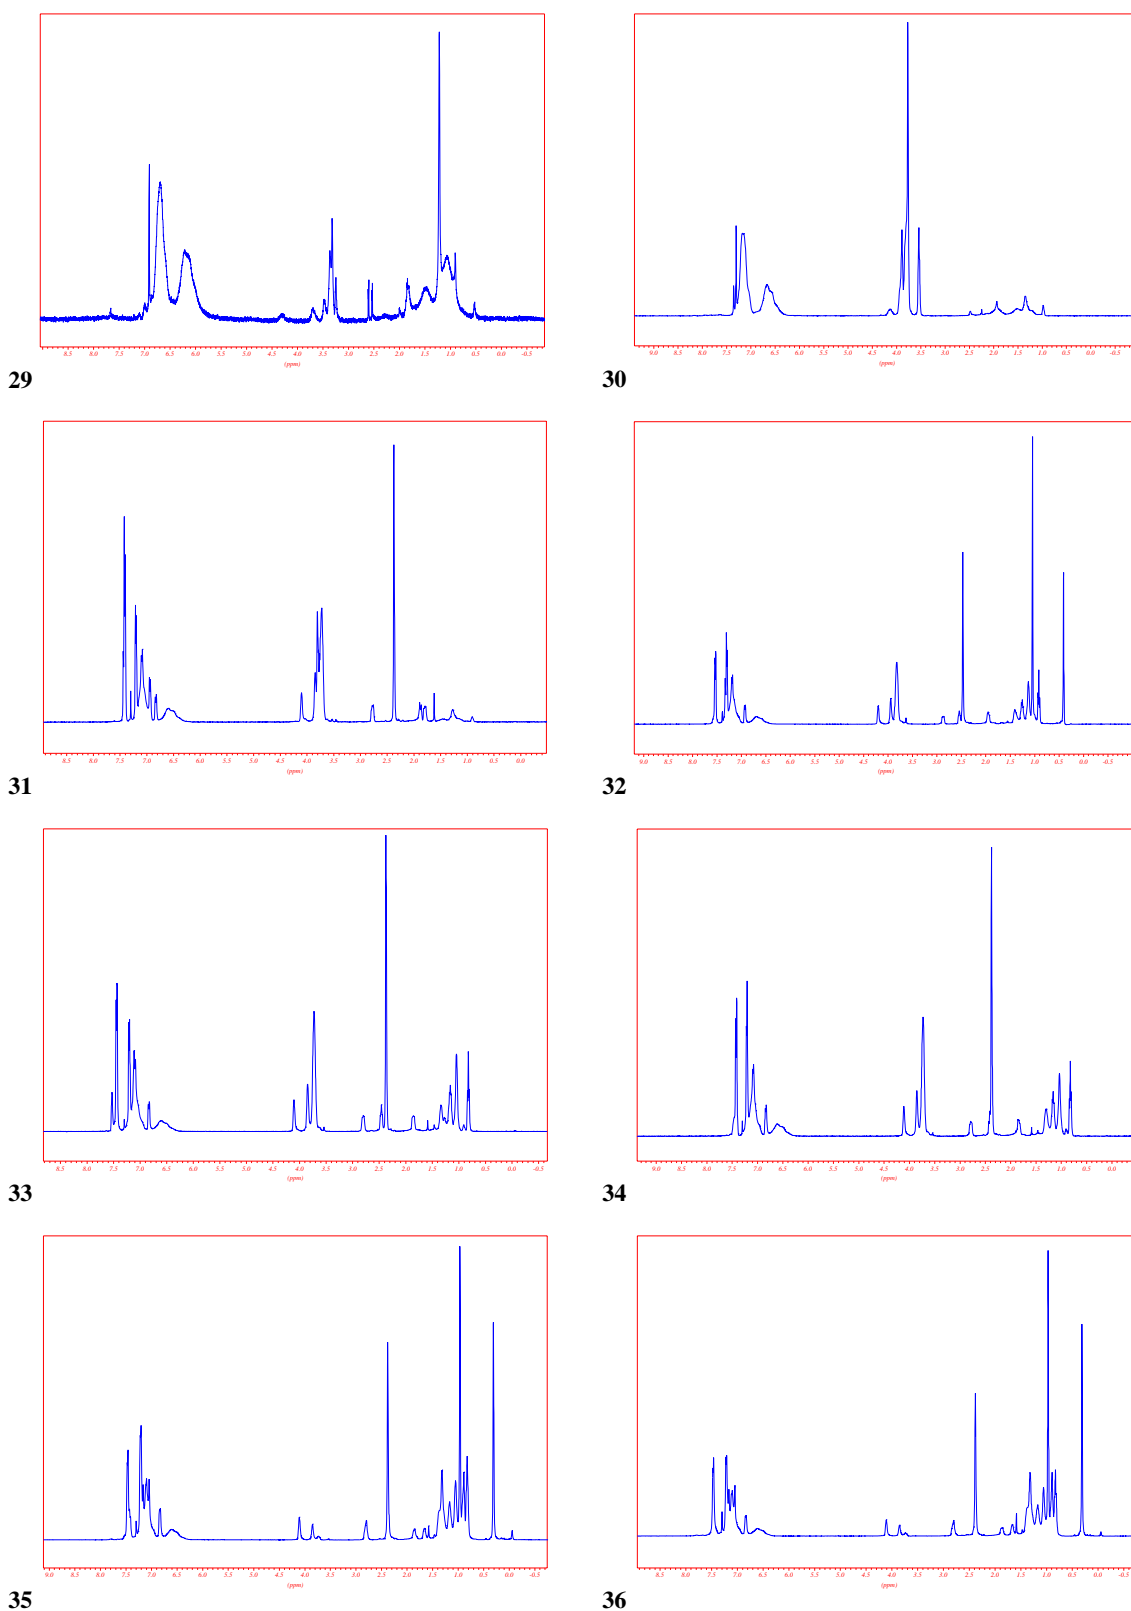

**Figure 1.**  $^1\text{H}$  MAS NMR (400 MHz,  $\text{CDCl}_3$ ) spectra for resins 30-36. *NB.* All spectra except that for the initial resin 29 are Car-Purcell-Meiboon-Gill (CPMG) processed.<sup>6,7</sup>

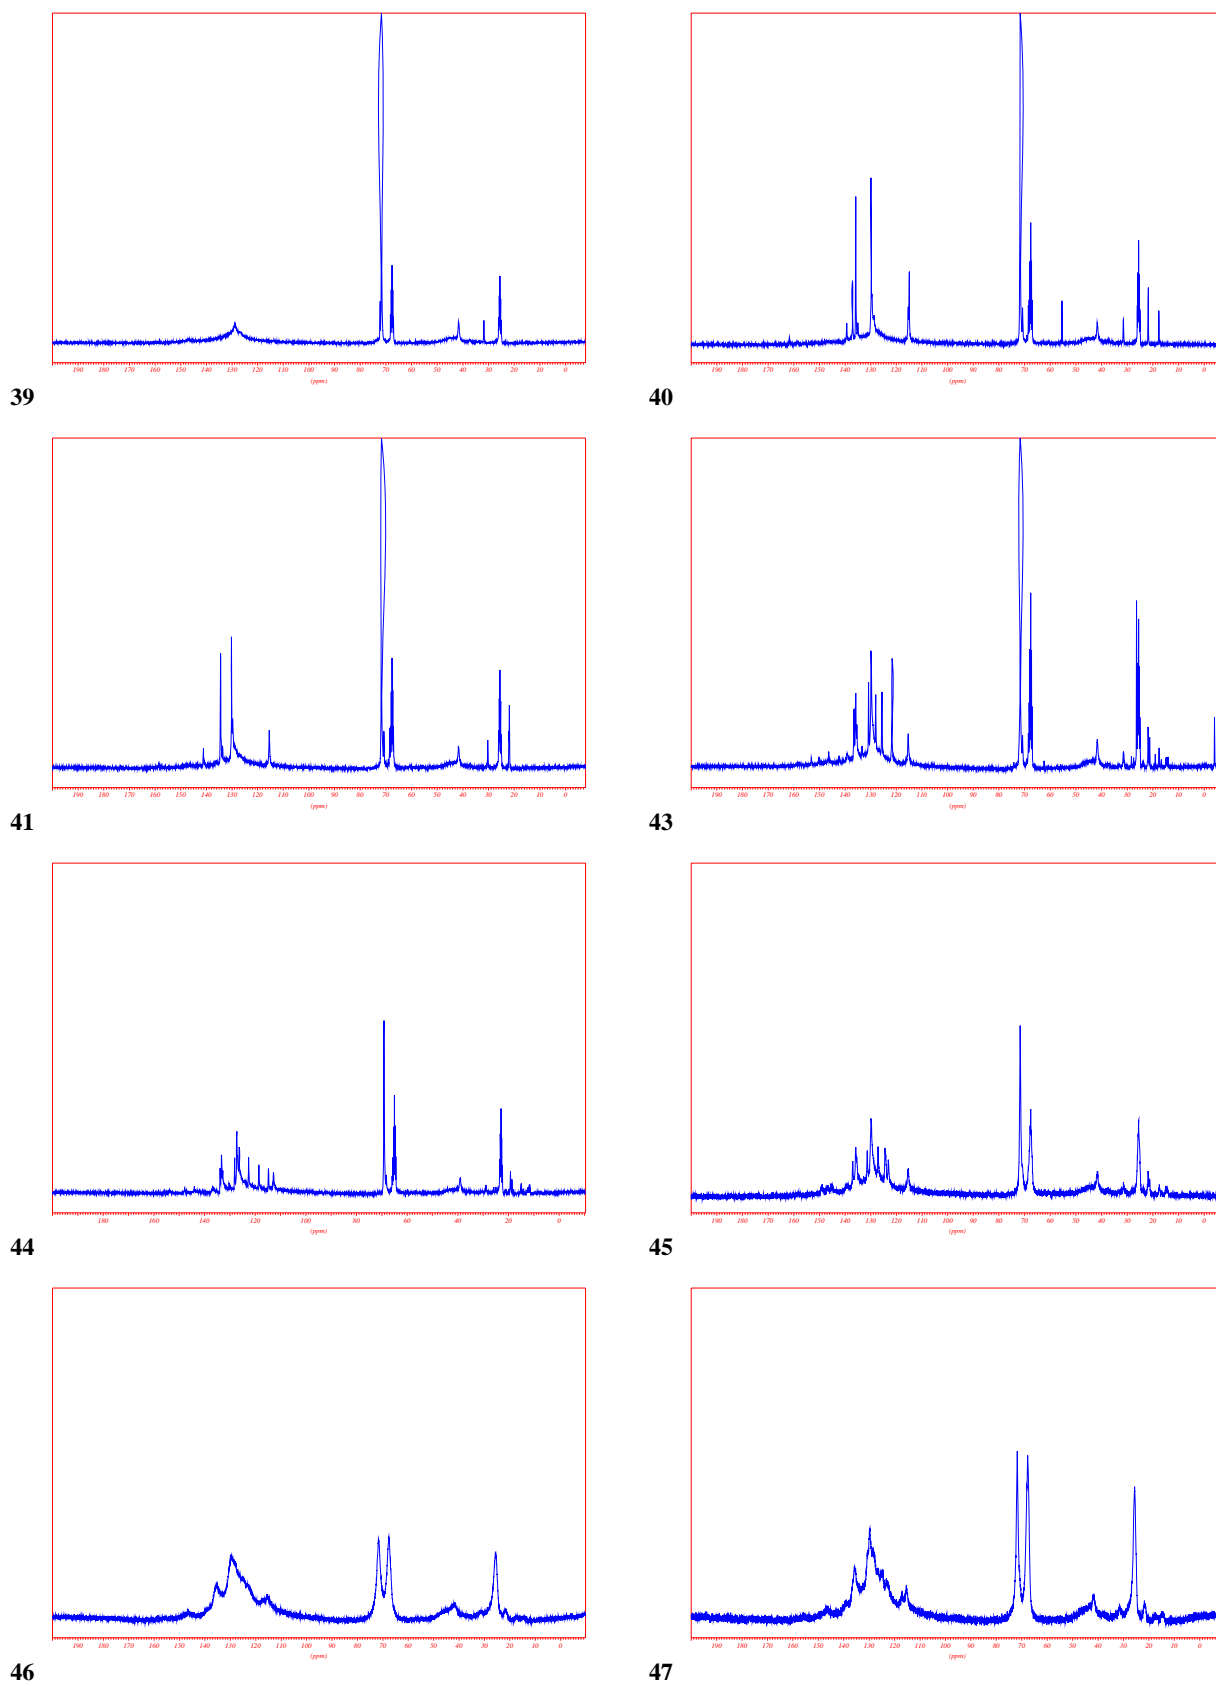

Figure 2. Gel phase  $^{13}\text{C}$  NMR (75 MHz,  $d_8$ -THF) spectra for resins 39-41 & 43-47.

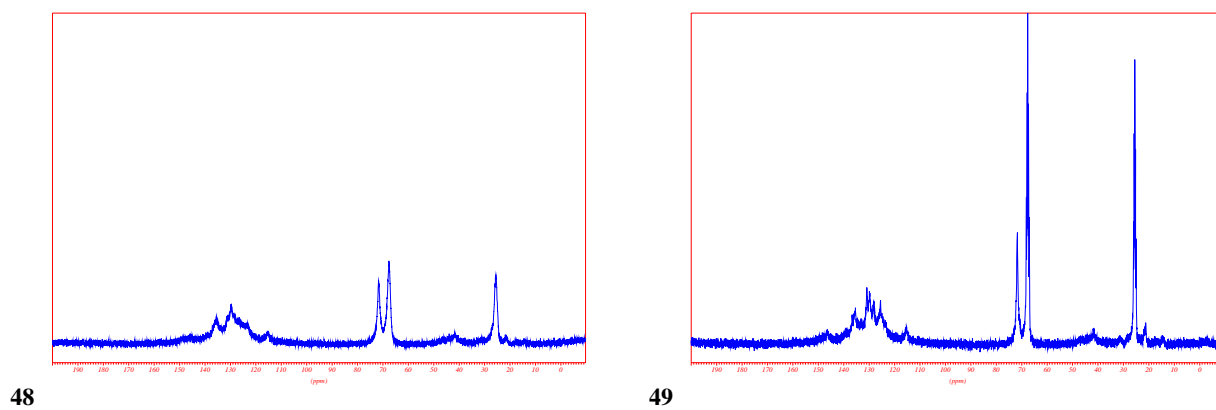

**Figure 3.** Gel phase <sup>13</sup>C NMR (75 MHz, *d*<sub>8</sub>-THF) spectra for resins **48** & **49**.

***N*'-[4'-(Di-*para*-tolylaminobiphenyl-4-yl)]-*N*-(4'-phenyl)-*N,N'*-di-*para*-tolyl-biphenyl-4,4'-diamine 50.**

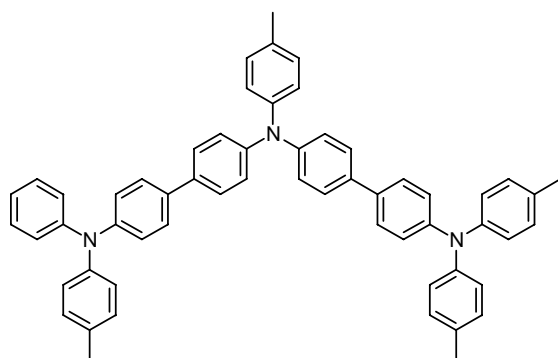

$C_{58}H_{49}N_3$   
Mol. Wt.: 788.03  
C, 88.40; H, 6.27; N, 5.33

**$^1H$  NMR (400 MHz,  $CDCl_3$ )**

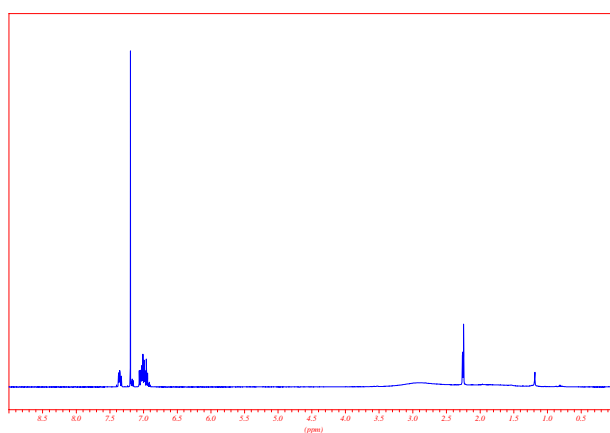

**$^{13}C$  NMR (100 MHz,  $CDCl_3$ )**

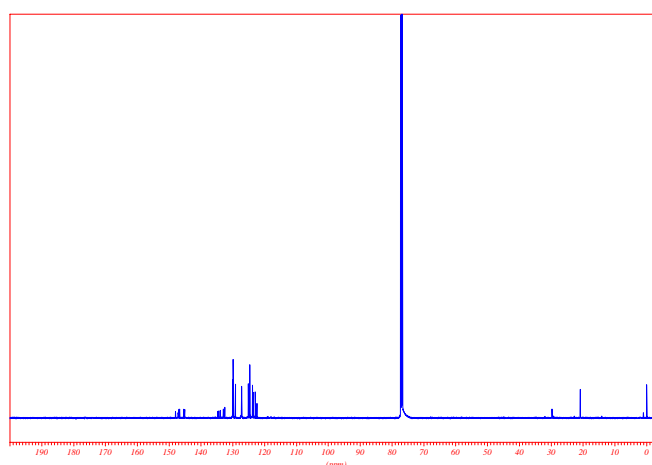

**HPLC:** Jupiter ODS-C18 column (250 × 0.46 cm), UV 300 nm detection, 1 mLmin<sup>-1</sup>, 5→100% MeCN in H<sub>2</sub>O + 0.1% formic acid, R<sub>t</sub> = 9.7 min.

#### Sample Information

|                  |              |                   |                   |
|------------------|--------------|-------------------|-------------------|
| SampleName       | 3757/31      | Date Acquired     | 27/09/05 14:49:54 |
| Vial             | 12           | Acq Method Set    | oligsensitive     |
| Injection        | 1            | Processing Method | Default           |
| Injection Volume | 4.00 ul      | Date Processed    | 27/09/05 15:10:09 |
| Channel Name     | 300          | MSY               |                   |
| Run Time         | 20.0 Minutes | Analyst           | ra                |

#### Auto-Scaled Chromatogram

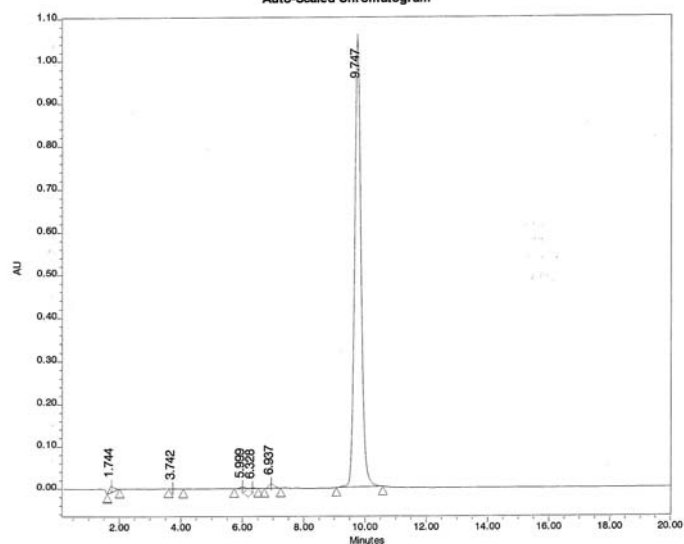

#### Peak Results

| PK | RT    | Area     | % Area | Height  |
|----|-------|----------|--------|---------|
| 1  | 1.744 | 174851   | 1.11   | 14772   |
| 2  | 3.742 | 11353    | 0.07   | 1063    |
| 3  | 5.999 | 40396    | 0.26   | 3670    |
| 4  | 6.328 | 17042    | 0.11   | 1718    |
| 5  | 6.937 | 134925   | 0.85   | 10840   |
| 6  | 9.747 | 15424850 | 97.60  | 1045799 |

Signature:.....

Date:...../...../.....

## References.

- 1 K. J. Hoffmann and P. J. Carlsen, *Synth. Commun.*, 1999, **29**, 1607.
- 2 A. C. Spivey, D. J. Turner, M. L. Turner, and S. Yeates, *Synlett*, 2004, 111.
- 3 H. Taniguchi and E. Nomura, *Chem. Lett.*, 1988, 1773.
- 4 D. S. Galvao, D. A. Dos Santos, B. Laks, and M. C. Dos Santos, *Synth. Met.*, 1991, **43**, 3521.
- 5 A. C. Spivey, C. M. Diaper, H. Adams, and A. J. Rudge, *J. Org. Chem.*, 2000, **65**, 5253.
- 6 H. Y. Carr and E. M. Purcell, *Phys. Rev.*, 1954, **94**, 630.
- 7 S. Meiboom and D. Gill, *Rev. Sci. Instrum.*, 1958, **29**, 688.
